1 PIKfyve/Fab1 is required for efficient V-ATPase and  
2 hydrolase delivery to phagosomes, phagosomal killing, and  
3 restriction of *Legionella* infection

---

4 Catherine M. Buckley<sup>1,2</sup>, Victoria L. Heath<sup>3</sup>, Aurélie Guého<sup>4</sup>, Cristina Bosmani<sup>4</sup>, Paulina Knobloch<sup>5</sup>,  
5 Phumzile Sikakana<sup>1</sup>, Nicolas Personnic<sup>5</sup>, Stephen K. Dove<sup>6</sup>, Robert H. Michell<sup>6</sup>, Roger Meier<sup>7\*</sup>, Hubert  
6 Hilbi<sup>5</sup>, Thierry Soldati<sup>4</sup>, Robert H. Insall<sup>8#</sup> and Jason S. King<sup>1,2#</sup>

7 <sup>1</sup>Centre for Membrane Interactions and Dynamics, Department of Biomedical Sciences, University of  
8 Sheffield, Firth Court, Western Bank, Sheffield. S10 2TN, UK

9 <sup>2</sup>Bateson Centre, University of Sheffield, Firth Court, Western Bank, Sheffield. S10 2TN, UK

10 <sup>3</sup>Institute of Cardiovascular Sciences, Institute for Biomedical Research, College of Medical and  
11 Dental Sciences, University of Birmingham, Edgbaston, Birmingham, B15 2TT, UK

12 <sup>4</sup>Department of Biochemistry, Faculty of Sciences, University of Geneva, CH-1211 Geneva,  
13 Switzerland

14 <sup>5</sup>Institute of Medical Microbiology, University of Zürich, CH-8006 Zürich, Switzerland

15 <sup>6</sup>School of Biosciences, University of Birmingham, Edgbaston, Birmingham. B15 2TT, UK

16 <sup>7</sup>Institute of Molecular Life Sciences, University of Zürich, CH-8057 Zürich, Switzerland

17 <sup>8</sup>CRUK Beatson Institute, Switchback Road, Bearsden, Glasgow G61 1BD, UK

18 \* Present address: Scientific Center for Optical and Electron Microscopy, ETH Zürich, CH-8093 Zürich,  
19 Switzerland

20 #Address correspondence to [Jason.King@sheffield.ac.uk](mailto:Jason.King@sheffield.ac.uk), [R.Insall@beatson.gla.ac.uk](mailto:R.Insall@beatson.gla.ac.uk)

21 **Running head:** PIKfyve in Dictyostelium

22 **Abstract word count:**

23 **Article word count:**

## 24 Abstract

25 By engulfing potentially harmful microbes, professional phagocytes are continually at risk from  
26 intracellular pathogens. To avoid becoming infected, the host must kill pathogens in the phagosome  
27 before they can escape or establish a survival niche. Here, we analyse the role of the  
28 phosphoinositide (PI) 5-kinase PIKfyve in phagosome maturation and killing, using the amoeba and  
29 model phagocyte *Dictyostelium discoideum*.

30 PIKfyve plays important but poorly understood roles in vesicular trafficking by catalysing formation  
31 of the lipids phosphatidylinositol (3,5)-bisphosphate (PI(3,5)<sub>2</sub>) and phosphatidylinositol-5-phosphate  
32 (PI(5)P). Here we show that its activity is essential during early phagosome maturation in  
33 *Dictyostelium*. Disruption of *PIKfyve* inhibited delivery of both the vacuolar V-ATPase and proteases,  
34 dramatically reducing the ability of cells to acidify newly formed phagosomes and digest their  
35 contents. Consequently, *PIKfyve*<sup>-</sup> cells were unable to generate an effective antimicrobial  
36 environment and efficiently kill captured bacteria. Moreover, we demonstrate that cells lacking  
37 *PIKfyve* are more susceptible to infection by the intracellular pathogen *Legionella pneumophila*. We  
38 conclude that PIKfyve-catalysed phosphoinositide production plays a crucial and general role in  
39 ensuring early phagosomal maturation, protecting host cells from diverse pathogenic microbes.

## 40 Importance

41 Cells that capture or eat bacteria must swiftly kill them to prevent pathogens from surviving long  
42 enough to escape the bactericidal pathway and establish an infection. This is achieved by the rapid  
43 delivery of components that produce an antimicrobial environment in the phagosome, the  
44 compartment containing the captured microbe. This is essential both for the function of immune  
45 cells and for amoebae that feed on bacteria in their environment. Here we identify a central  
46 component of the pathway used by cells to deliver antimicrobial components to the phagosome and  
47 show that bacteria survive over three times as long within the host if this pathway is disabled. We  
48 show that this is of general importance for killing a wide range of pathogenic and non-pathogenic  
49 bacteria, and that it is physiologically important if cells are to avoid infection by the opportunistic  
50 human pathogen *Legionella*.

## 51 Introduction

52 Professional phagocytes must kill their prey efficiently if they are to prevent the establishment of  
53 infections [1]. Multiple mechanisms are employed to achieve this. Once phagosomes have been  
54 internalised they quickly become acidified and acquire reactive oxygen species, antimicrobial  
55 peptides and acid hydrolases. The timely and regulated delivery of these components is vital to  
56 protect the host from intracellular pathogens but is incompletely understood.

57 After a particle is internalised, specific effector proteins are recruited to the phagosome's  
58 cytoplasmic surface by interacting with several inositol phospholipids (PIPs) that play important roles  
59 in regulating vesicle trafficking and controlling maturation. The effectors of each PIP regulate  
60 particular aspects of compartment identity, membrane trafficking and endosomal maturation [2, 3].  
61 Phosphatidylinositol-3-phosphate (PI(3)P), made by the class III PI 3-kinase VPS34, is one of the first  
62 PIPs to accumulate on vesicles after endocytosis, and PI(3)P recruits proteins containing FYVE (Fab1,  
63 YOTB, Vac1 and EEA1) and PX domains, such as the canonical early endosome markers EEA1 and Hrs,  
64 and sorting nexins [4, 5]. Also recruited to early endosomes by its FYVE domain is PIKfyve (Fab1 in  
65 yeast) [6], a phosphoinositide 5-kinase that phosphorylates PI(3)P to phosphatidylinositol-3,5-  
66 bisphosphate (PI(3,5)P<sub>2</sub>) [7-11]. The roles of PI(3)P are well explored but the formation of PI(3,5)P<sub>2</sub>  
67 and the identities and functions of its effector proteins and its metabolic product PI(5)P are less well  
68 understood [12-14]. PI(3,5)P<sub>2</sub> is thought to accumulate predominantly on late endosomes, and  
69 disruption of PIKfyve activity leads to multiple endocytic defects, including gross endosomal  
70 enlargement and accumulation of autophagosomes [15-20]. Recent research has begun to reveal  
71 important physiological roles of PIKfyve and its products in a variety of eukaryotes, but mechanistic  
72 details remain sparse [21-25].

73 As in classical endocytosis, phagosome maturation is regulated by PIPs [26]. Phagosomes accumulate  
74 PI(3)P immediately after closure, and this is required for their subsequent maturation [27-29]. The  
75 recent identification of several PIKfyve inhibitors, including apilimod and YM201636 [30, 31], has  
76 allowed researchers to demonstrate the importance of PI(3)P to PI(3,5)P<sub>2</sub> conversion for phagosomal  
77 maturation in macrophages and neutrophils [32-35]. However, there are conflicting reports on the  
78 roles of PIKfyve in key lysosomal functions such as acidification and degradation, with some studies  
79 reporting defective acidification upon PIKfyve inhibition [10, 36, 37] and others finding little effect  
80 [33, 38, 39]. Therefore the mechanistic roles of PIKfyve and its products, and their relevance to  
81 phagosome maturation, remain unclear and subject to debate.

82 To understand the function and physiological significance of PIKfyve, we have investigated its role in  
83 phagosome maturation and pathogen killing in *Dictyostelium discoideum*, a soil-dwelling amoeba

84 and professional phagocyte that feeds on bacteria. *Dictyostelium* PIPs are unusual, with the lipid  
85 chain joined to the *sn*-1-position of the glycerol backbone by an ether, rather than ester, linkage:  
86 these PIPs should correctly be named as derivatives of plasmalinositol rather than  
87 phosphatidylinositol [40]. This, however, makes no known difference to downstream functions,  
88 which are dictated by interactions between the inositol polyphosphate headgroups and effector  
89 proteins. *Dictyostelium* has thus been an effective model for analysis of phosphoinositide signalling  
90 [41-44]. For convenience, both the mammalian and *Dictyostelium* inositol phospholipids are referred  
91 to as PIPs hereafter.

92 We find that genetic or pharmacological disruption of PIKfyve activity in *Dictyostelium* leads to a  
93 swollen endosomal phenotype reminiscent of defects in macrophages. We provide a detailed  
94 analysis of phagosome maturation, and show that at least some of the defects in PIKfyve-deficient  
95 cells are due to reduced recruitment of the proton-pumping vacuolar (V-ATPase). Finally, we  
96 demonstrate that PIKfyve activity is required for the efficient killing of phagocytosed bacteria and for  
97 restricting the intracellular growth of the pathogen *Legionella pneumophila*.

98

99 **Results**

100 ***PIKfyve*<sup>-</sup> *Dictyostelium* have swollen endosomes**

101 The *Dictyostelium* genome contains a single orthologue of *PIKfyve* (*PIP5K3*). Like the mammalian and  
102 yeast proteins, *Dictyostelium* *PIKfyve* contains an N-terminal FYVE domain, a CCT (chaperonin  
103 Cpn60/TCP1)-like chaperone domain, a *PIKfyve*-unique cysteine/histidine-rich domain and a C-  
104 terminal PIP kinase domain [7]. In order to investigate the role of PI(3,5)P<sub>2</sub> in *Dictyostelium* we  
105 disrupted the *PIKfyve* gene in the axenic Ax3 background by inserting a blasticidin resistance cassette  
106 and deleting a portion of the central *PIKfyve*-unique region (Supplementary Figure 1).

107 While the unusual ether-linked chemistry of the *Dictyostelium* inositol phospholipids prevented  
108 direct measurement of PI(3,5)P<sub>2</sub> loss by either the standard method of methanolysis followed by  
109 HPLC of deacylation products or by mass spectrometry, we found that each mutant strain was highly  
110 vacuolated (Figure 1A and B), resembling the swollen vesicle phenotype observed upon *PIKfyve*  
111 knockdown or inhibition in mammalian cells, *C. elegans*, *S. cerevisiae* and *D. melanogaster* [10, 15,  
112 20, 45]. This effect was recapitulated by incubation with the *PIKfyve*-specific inhibitor apilimod [30],  
113 confirming that this phenotype was due to deficient *PIKfyve* activity, most likely via the production  
114 of PI(3,5)P<sub>2</sub> or PI(5)P (Figure 1C).

115 When *PIKfyve*- amoebae were hypotonically stressed in phosphate buffer, we observed a sustained  
116 increase in vacuolation for at least 5 hours. However, after 24 hours – when the cells became  
117 polarized indicating the onset of starvation-induced development – *PIKfyve*- mutants became  
118 indistinguishable from the random integrant and parental controls (Figure 1B). This is most likely due  
119 to the suppression of fluid-phase uptake that occurs when *Dictyostelium* cells enter starvation-  
120 induced development [46, 47]. Consistent with this interpretation, *PIKfyve*<sup>-</sup> cells had no observable  
121 delay or other defects in development, and formed morphologically normal fruiting bodies with  
122 viable spores (Supplementary Figure 2). Therefore, disruption of *PIKfyve* leads to endocytic defects  
123 but it is not required for *Dictyostelium* development.

124 ***PIKfyve* is important for phagocytic growth but not uptake**

125 Laboratory strains of *Dictyostelium* can obtain nutrients by macropinocytosis of liquid (axenic)  
126 medium or by phagocytosis of bacteria. Whilst *PIKfyve*<sup>-</sup> cells had normal rates of both endocytosis  
127 and exocytosis, axenic growth was slower than for wild-type cells, with mutants doubling every 16  
128 hours compared to 10 hours for the controls (Figure 2A-C).

129 Growth on bacteria was more strongly affected. When we measured phagocytosis by following the  
130 ability of *Dictyostelium* cells to decrease the turbidity of an *E. coli* suspension over time we found no

131 significant defects in *PIKfyve*<sup>-</sup> cells (Figure 2D). In contrast, they grew significantly more slowly on a  
132 lawn of *Klebsiella pneumoniae* (Figure 2E). This indicates a specific role for PIKfyve activity in  
133 phagosome maturation rather than bacterial uptake.

#### 134 ***PIKfyve* deficient cells have defective phagosome acidification and V-ATPase delivery**

135 Next we investigated how the absence of PIKfyve affects phagosomal maturation. One of the first  
136 stages of maturation is the acquisition of the proton-pumping V-ATPase, leading to rapid  
137 acidification [48, 49]. The influence of PIKfyve on endosomal pH regulation remains controversial:  
138 studies in *C. elegans*, plants, and mammalian epithelial cells have shown that PIKfyve is required for  
139 efficient acidification [37, 45, 50-52], but RAW 264.7 macrophages are still able to acidify their  
140 phagosomes to at least pH 5.5 when treated with a PIKfyve inhibitor [33].

141 Phagosome maturation is well characterised in *Dictyostelium*, with most studies being performed  
142 using mutants in the Ax2 genetic background, rather than Ax3 as used above. For comparison with  
143 other studies we isolated additional mutants from Ax2 cells, which were used for all subsequent  
144 experiments unless stated otherwise. Ax2 background *PIKfyve* mutants also exhibited slow growth  
145 on bacterial lawns but normal phagocytosis of both beads and bacteria (supplementary figure 3),  
146 confirming that these phenotypes are robust across multiple genetic backgrounds.

147 We followed phagosome acidification in *PIKfyve*<sup>-</sup> *Dictyostelium* by measuring changes in the relative  
148 fluorescence of engulfed beads that had been labelled both with the pH-sensitive FITC and the pH-  
149 insensitive Alexa 594 succinimidyl ester [53]. Phagosomes from wild-type cells rapidly became  
150 acidified and remained acidic until ~40 minutes before transitioning to neutral post-lysosomes, but  
151 phagosomes of *PIKfyve*<sup>-</sup> cells acidified much more slowly and never achieved as low a pH (Figure 3A).

152 Phagosomal acidification is driven by the rapid recruitment and activity of the V-ATPase. To  
153 differentiate between defective V-ATPase delivery and activity, we directly imaged recruitment of  
154 the VatM transmembrane subunit of the V-ATPase fused to GFP to nascent phagosomes by  
155 microscopy. By observing the phagocytosis of pH-sensitive pHrodo-labelled yeast we were able to  
156 simultaneously monitor acidification.

157 GFP-VatM began accumulating on phagosomes immediately following internalisation both in  
158 *PIKfyve*<sup>-</sup> and control cells, but it accumulated more slowly in the mutants and to only about half of  
159 the levels observed in wild-type cells (Figure 3B and C). Defective acidification was further  
160 demonstrated by a reduced increase in pHrodo fluorescence (Figure 3D). We conclude that there is  
161 some PIKfyve-independent lysosomal fusion with phagosomes, but that PIKfyve activity is required  
162 for the high levels of V-ATPase accumulation that are needed for efficient phagosomal acidification.

163 The V-ATPase consists of  $V_0$  (transmembrane) and  $V_1$  (peripheral) subcomplexes. It has previously  
164 been suggested that  $PI(3,5)P_2$  can regulate  $V_0$ - $V_1$  assembly at the yeast vacuole allowing dynamic  
165 regulation of activity [54]. VatM is a component of the  $V_0$  subcomplex (subunit a in mammals and  
166 yeast). To test whether  $V_0$ - $V_1$  association is also affected by loss of *PIKfyve* we observed the  
167 phagosomal recruitment of the  $V_1$  subunit VatB fused to GFP [55]. Both GFP-VatM and VatB-GFP  
168 were expressed equally in wild-type and mutant cells (Supplementary Figure 4A). As before VatB-  
169 GFP recruitment to nascent phagosomes was also significantly decreased in *PIKfyve*<sup>-</sup> cells  
170 (Supplementary Figure 4B and C)

171 It should be noted that expression of VatB-GFP (but not GFP-VatM) caused a partial inhibition of  
172 acidification in this assay, indicating caution should be taken in using this construct (Supplementary  
173 Figure 4D). Nevertheless, the observation that both V-ATPase components were equally affected by  
174 *PIKfyve* deletion suggests that *PIKfyve* is required for delivery of the entire V-ATPase to the  
175 phagosome, rather than specifically affecting  $V_0$ - $V_1$  association.

#### 176 **Proteolytic activity and hydrolase delivery are specifically affected in *PIKfyve*<sup>-</sup> cells**

177 Proper degradation of internalised material requires both acidification and the activity of proteases.  
178 To test if hydrolytic activity was also dependent on *PIKfyve*, we measured phagosomal proteolysis by  
179 following the increase in fluorescence due to the cleavage and unquenching of DQ-bovine serum  
180 albumin (DQ-BSA) coupled to beads [53] (Figure 4A). Strikingly, despite their partial acidification,  
181 phagosomes in *PIKfyve*<sup>-</sup> cells exhibited an almost complete loss of proteolytic activity. To control for  
182 a potential general decrease in protease activity, we measured the unquenching of DQ-BSA beads in  
183 whole cell lysates (Figure 4B) and the protein levels of lysosomal protease cathepsin D by Western  
184 blot (Figure 4C and D). Although activity in the phagosome is completely lost, we found that total  
185 lysosomal activity remained normal and cathepsin D levels were significantly increased upon loss of  
186 *PIKfyve*, consistent with a defect in delivery to the phagosome, rather than in lysosomal biogenesis.

187 To investigate whether *PIKfyve* activity was required to deliver proteases to the phagosome, we  
188 purified phagosomes at different stages of maturation and analysed their composition by Western  
189 blot (Figure 4E). In wild-type cells phagosomes acquired cathepsin D from the earliest time-point,  
190 but the protease was almost completely absent from phagosomes in *PIKfyve*<sup>-</sup> cells. Whilst the  
191 delivery of the vacuolar ATPase was also qualitatively reduced in this assay, consistent with  
192 decreased acidification, Actin-binding protein 1 (Abp1), an independent marker of phagosome  
193 maturation [56], was unaffected. Thus, although both hydrolase and to a lesser extent V-ATPase  
194 delivery requires *PIKfyve* activity, other aspects of maturation appear to progress normally.

195 **PIKfyve does not regulate PI(3)P dynamics**

196 We next wanted to confirm whether loss of PIKfyve disrupts specific aspects of phagosome  
197 maturation or causes a general trafficking defect. PI(3)P is one of the best characterized early  
198 markers of maturing endosomes and phagosomes in both mammalian macrophages and  
199 *Dictyostelium*. Immediately following particle internalization, PI(3)P is generated on the phagosome  
200 by the class III PI 3-kinase VPS34 [27, 33, 57] and interacts with a number of important regulators of  
201 maturation such as Rab5 [58]. PIKfyve is both recruited by PI(3)P and phosphorylates it, forming  
202 PI(3,5)P<sub>2</sub>. Loss of PIKfyve activity could perturb phagosome maturation by reducing PI(3)P  
203 consumption, by eliminating the actions of PI(3,5)P<sub>2</sub>, or both. Studies on macrophages have  
204 indicated that inhibition of PIKfyve can cause prolonged PI(3)P signalling [33].

205 PI(3)P can be visualized in cells using the well-characterised reporter GFP-2xFYVE [41, 59].  
206 Expression of GFP-2xFYVE in control cells demonstrated that PI(3)P is present on *Dictyostelium*  
207 phagosomes immediately following engulfment, consistent with previous reports [57] (Figure 4F).  
208 However, we found no abnormalities in either the recruitment to or the dissociation from  
209 phagosomes of this reporter in *PIKfyve*<sup>-</sup> mutants (Figure 4F and G). PIKfyve activity seems not to  
210 influence the steady-state levels of PI(3)P in *Dictyostelium*, and the functional defects in *PIKfyve*<sup>-</sup>  
211 cells therefore are likely to be caused by a lack of the product(s) of PIKfyve activity.

212 Overall, the normal transition of *PIKfyve*<sup>-</sup> phagosomes into a PI(3)P-negative compartment indicates  
213 that much of their phagosome maturation process continues normally – but with the product(s) of  
214 PIKfyve action playing specific role(s) in the delivery of certain important components, including the  
215 V-ATPase and hydrolytic enzymes.

216 **PIKfyve is essential for efficient killing of bacteria**

217 Acidification and proteolysis are important mechanisms used by phagocytes to kill engulfed  
218 microbes. We therefore asked whether PIKfyve was physiologically important for killing. Bacterial  
219 death leads to membrane permeabilisation and intracellular acidification, so survival time within  
220 phagosomes can be inferred by observing the phagocytosis and subsequent quenching of GFP  
221 fluorescence when expressed by a non-pathogenic *Klebsiella pneumoniae* strain [60]. In this assay,  
222 the phagocytosed bacteria survived more than three times longer in *PIKfyve*<sup>-</sup> cells (median survival  
223 12 min) than in wild-type cells (3.5 min) (Figure 5A and B). These benign bacteria did eventually die  
224 in *PIKfyve*<sup>-</sup> cells, indicating either that the residual acidification is eventually sufficient or that enough  
225 other elements of the complex bacterial killing machinery remain functional in *PIKfyve*<sup>-</sup> phagosomes.



226 These defects in bacterial killing and digestion (Figure 4) explain why PIKfyve is important for  
227 *Dictyostelium* to grow on a lawn of *K. pneumoniae* (Figure 2E). To test whether this is general to a  
228 broad range of bacteria, we employed an assay whereby serial dilutions of amoebae are plated on  
229 lawns of a panel including both Gram-positive and Gram-negative bacteria [61]. In this assay,  
230 PIKfyve-deficient cells were severely inhibited in growth on all bacteria tested, demonstrating a  
231 general role for PIKfyve in bacterial killing and digestion.

### 232 **PIKfyve activity restricts the persistence of *Legionella* infection**

233 Many pathogenic bacteria infect host immune cells by manipulating phagosome maturation to  
234 establish a replication-permissive niche or to escape into the cytosol. To avoid infection, host cells  
235 must efficiently kill such pathogens; hence PIKfyve might be critical to protect host cells from  
236 infection.

237 *Legionella pneumophila* is a Gram-negative opportunistic human pathogen that normally lives in the  
238 environment by establishing replicative niches inside amoebae such as *Acanthamoeba*. This process  
239 can be replicated in the laboratory using *Dictyostelium* as an experimental host [62]. Following its  
240 phagocytosis, *Legionella* can disrupt normal phagosomal maturation and form a unique *Legionella*-  
241 containing vacuole (LCV). This requires the Icm/Dot (Intracellular multiplication/Defective for  
242 organelle trafficking) type IV secretion system that delivers a large number of bacterial effector  
243 proteins into the host (reviewed in [63]). These effectors modify many host signalling and trafficking  
244 pathways, one of which prevents the nascent *Legionella*-containing phagosome from fusing with  
245 lysosomes [64].

246 Phosphoinositide signalling is heavily implicated in *Legionella* pathogenesis, with *Legionella*-  
247 containing phagosomes rapidly accumulating PI(3)P. Its concentration then declines within 2 hours  
248 and PI(4)P accumulates [65]. Multiple effectors introduced through the Icm/Dot system bind PI(3)P  
249 or PI(4)P [66-72]. The role of PI(3,5)P<sub>2</sub> (and/or PI(5)P) in *Legionella* infection is yet to be investigated,  
250 so we tested whether PIKfyve was beneficial or detrimental for the host to restrain *Legionella*  
251 infection.

252 When we measured the rate of uptake of GFP-expressing *Legionella* by flow cytometry, we found  
253 PIKfyve<sup>-</sup> *Dictyostelium* were indistinguishable from wild-type. Both strains phagocytosed many more  
254 of the virulent wild-type *Legionella* strain (JR32) than an avirulent strain that is defective in type IV  
255 secretion ( $\Delta icmT$ ) [73] (Figure 6A). These results are in agreement with the previous finding that  
256 expression of the Icm/Dot T4SS promotes uptake of *Legionella* [74]. When we measured the ability

257 of *Dictyostelium* to kill *Legionella ΔicmT*, the bacteria survived for significantly longer in *PIKfyve*- cells  
258 (Figure 6B).

259 We next tested the role of *PIKfyve* on the outcome of infection. When Ax2 and *PIKfyve* mutants  
260 were infected with either wild-type or *ΔicmT Legionella*, using a MOI of 0.1 to compensate for the  
261 greater uptake of wild-type *Legionella*, both amoeba strains suppressed the avirulent bacteria,  
262 although the reduction in bacteria was slower in the *PIKfyve* mutants. In contrast, wild-type  
263 *Legionella* grew substantially faster in cells lacking *PIKfyve* (Figure 6C, note that the CFUs scales in  
264 Figure 6B and C are logarithmic). We independently confirmed these results using flow cytometry of  
265 cells infected with GFP-producing bacteria in our Ax3-background mutants. The only *Dictyostelium*  
266 cells that accumulated substantial GFP fluorescence over several days were those infected by wild-  
267 type *Legionella*, and this happened sooner and to a greater degree in the *PIKfyve*- cells (Figure 6D).

268 Unlike PI(3)P and PI(4)P, the lipid products of *PIKfyve* are thus not required for *Legionella* to subvert  
269 phagosome maturation and generate its replicative vacuole. Rather, the role of *PIKfyve* in ensuring  
270 rapid phagosomal acidification and digestion is crucial for the host to prevent *Legionella*, and  
271 presumably other pathogens, from surviving and establishing a permissive niche.

272

## 273 Discussion

274 In this study, we have characterised the role of PIKfyve during phagosome maturation using the  
275 model phagocyte *Dictyostelium*. The roles of PI 3-kinases and PI(3)P signalling during phagosome  
276 formation and early maturation have been studied extensively but the subsequent actions of PIKfyve  
277 and roles of PI(3,5)P<sub>2</sub> and PI(5)P are much less well understood [3, 26]. In non-phagocytic cells such  
278 as fibroblasts and yeast, PI(3,5)P<sub>2</sub> production is important for endosomal fission and fragmentation  
279 of endolysosomal compartments [10, 18, 37, 45], and PIKfyve inhibition has been shown to cause  
280 macrophage lysosomes to coalesce by an unknown mechanism [34]. PIKfyve also regulates  
281 macropinosome maturation [38], intracellular replication of the *Vaccinia* virus and *Salmonella* [38,  
282 51, 75] and production of reactive oxygen species (ROS) in neutrophils [35]. In this paper we show  
283 that PIKfyve is critical to ensure efficient phagosomal acidification and proteolysis via delivery of  
284 specific components, and we demonstrate its physiological importance in the killing of bacteria and  
285 suppression of intracellular pathogens.

286 Complex effects of PIKfyve inhibition on PIP-mediated signalling have hampered clear interpretation  
287 of PIKfyve function in some mammalian studies. For example, some studies report that disruption of  
288 PIKfyve both prolonged PI(3)P-mediated signalling and eliminated PI(3,5)P<sub>2</sub> production [30, 32],  
289 making it difficult to determine which phosphoinositide change is responsible for the observed  
290 phenotypes. In contrast, and in agreement with other reports in mammalian cells [18, 37], we found  
291 that deletion of PIKfyve had no impact on phagosomal PI(3)P dynamics in *Dictyostelium*. The defects  
292 in phagosome maturation that we observed in this system are thus due to lack of PI(3,5)P<sub>2</sub>/PI(5)P  
293 formation and not to prolonged PI(3)P signalling. There is limited evidence that PIKfyve might exhibit  
294 protein kinase activity [76], but whether this is relevant *in vivo* remains to be shown.

295 The role of PIKfyve in lysosomal acidification and degradation is currently disputed. Several studies  
296 which have measured vesicular pH at a single time point have shown that PIKfyve is required for  
297 acidification [10, 37, 45, 52], whereas others found that disruption of PIKfyve had little effect on  
298 phagosomal pH [33, 38, 39]. In contrast, we followed the temporal dynamics of V-ATPase delivery  
299 and of phagosomal acidification and proteolysis, and showed that V-ATPase delivery to PIKfyve-  
300 deficient phagosomes was substantially decreased and delayed, with consequent defects on initial  
301 acidification and proteolysis. PI(3,5)P<sub>2</sub> has also been proposed to regulate V-ATPase V<sub>0</sub>-V<sub>1</sub>  
302 subcomplex association dynamically at the yeast vacuole [54], but we found no evidence for this  
303 during *Dictyostelium* phagosome maturation.

304 It is still not clear how PIKfyve-generated PI(3,5)P<sub>2</sub> regulates V-ATPase trafficking, and few PI(3,5)P<sub>2</sub>  
305 effectors are known. One of these is the lysosomal cation channel TRPML1/mucopolin, which is

306 specifically activated by PI(3,5)P<sub>2</sub> [77]. This interaction was recently shown to partly underlie the role  
307 of PIKfyve in macropinosome fragmentation, although not acidification [38]. TRPML1 is also required  
308 for phagosome-lysosome fusion [78], and PI(3,5)P<sub>2</sub> and TRPML1 have been proposed to mediate  
309 interactions between lysosomes and microtubules [79]. PIKfyve may therefore drive V-ATPase  
310 delivery to phagosomes both by microtubule-directed trafficking and by regulating fission. However,  
311 the sole mucolipin orthologue in *Dictyostelium* is only recruited to phagosomes much later, during  
312 the post-lysosomal phase, and its disruption influences exocytosis rather than acidification [80].

313 Effective phagosomal acidification and proteolysis is essential if phagocytes are to kill internalised  
314 bacteria. Many clinically relevant opportunistic pathogens, including *Legionella* [63, 81],  
315 *Burkholderia cenocepacia* [82] and *Cryptococcus neoformans* [83], have developed the ability to  
316 subvert normal phagosome maturation so as to maintain a permissive niche inside host phagocytes.  
317 This ability is likely to have evolved from their ancestors' interactions with environmental predators  
318 such as amoebae [84-86].

319 *Legionella* are phagocytosed in the lung by alveolar macrophages. After internalisation, they employ  
320 effectors secreted via their Type IV secretion system, some of which interfere with PI(3)P-signalling,  
321 to inhibit phagosome maturation [67, 87, 88]. We have shown that the products of PIKfyve are not  
322 required for *Legionella* to establish an intracellular replication niche. Rather, *Legionella* survive much  
323 better in PIKfyve-deficient cells, suggesting that PI(3,5)P<sub>2</sub> helps *Dictyostelium* to eliminate rather  
324 than harbour *Legionella*.

325 This is in contrast to the non-phagocytic invasion of epithelia that occurs during *Salmonella* infection.  
326 In that case, PIKfyve activity is necessary to promote the generation of a specialised survival niche  
327 within which the bacteria replicate [51]. *Salmonella* has thus evolved a specific requirement for  
328 PIKfyve in generating a survival niche – likely through using phagosome acidification as a cue for  
329 virulence factor expression – whereas *Legionella* and other bacteria are suppressed by rapid and  
330 PIKfyve-driven phagosomal maturation.

331 The molecular arms race between host and pathogens is complex and of great importance. The very  
332 early events of phagosome maturation are critical in this competition; host cells aim to kill their prey  
333 swiftly whilst pathogens try to survive long enough to escape. Although its molecular effectors  
334 remain unclear, PIKfyve and its products are crucial to tip the balance in favour of the host, providing  
335 a general mechanism to ensure efficient antimicrobial activity.

## 336 Materials and Methods

### 337 Cell strains and culture

338 *Dictyostelium discoideum* cells were grown in adherent culture in plastic Petri dishes in HL5 medium  
339 (Formedium) at 22°C. *PIKfyve*<sup>-</sup> mutants were generated in both Ax2 and Ax3 backgrounds, with  
340 appropriate wild-type controls used in each case. Cells were transformed by electroporation and  
341 transformants selected in 20 µg/ml hygromycin (Invitrogen) or 10 µg/ml G418 (Sigma). Apilimod was  
342 from United States Biological.

343 Growth in liquid culture was measured by seeding log phase cells in a 6 well plate and counting cells  
344 every 12 hours using a haemocytometer. Growth on bacteria was determined by plating ~10  
345 *Dictyostelium* cells on SM agar plates (Formedium) spread with a lawn of non-pathogenic KpGe *K.*  
346 *pneumoniae* [89].

347 Plaque assays were performed as previously described [90]. Briefly, serial dilution of *Dictyostelium*  
348 cells (10<sup>-10</sup>) were placed on bacterial lawns and grown until visible colonies were obtained. The  
349 bacterial strains were kindly provided by Pierre Cosson and were: *K. pneumoniae* laboratory strain  
350 and 52145 isogenic mutant (Benghezal et al., 2006), the isogenic *P. aeruginosa* strains PT5 and  
351 PT531 (*rhlR-lasR* avirulent mutant) (Cosson et al., 2002), *E. coli* DH5α (Fisher Scientific), *E. coli* B/r  
352 (Gerisch, 1959), non-sporulating *B. subtilis* 36.1 (Ratner and Newell, 1978), and *M. luteus*  
353 (Wilczynska and Fisher, 1994). An avirulent strain of *K. pneumoniae* was obtained from ATCC (Strain  
354 no. 51697).

355 The *Dictyostelium* development was performed by spreading 10<sup>7</sup> amoebae on nitrocellulose filters  
356 (47 mm Millipore) on top of absorbent discs pre-soaked in KK2 (0.1 M potassium phosphate pH 6.1)  
357 and images were taken at 20 hours [91].

### 358 Gene disruption and molecular biology

359 *PIKfyve*<sup>-</sup> cells in an Ax2 background were generated by gene disruption using homologous  
360 recombination. A blasticidin knockout cassette was made by amplifying a 5' flanking sequence of the  
361 *PIKfyve* gene (DDB\_G0279149) (primers: fw- GG TAGATGTTTAGGTGGTGAAGT, rv-  
362 gatagctctgctactgaagCGAGTGGTGAATTCATAAAGG) and 3' flanking sequence (primers: fw-  
363 ctactggagtatccaagctgCCATTCAAGATAGACCAACCAATAG, rv- AGAATCAGAATAAACATCACCACC). These  
364 primers contained cross over sequences (in lower case) allowing a LoxP-flanked blasticidin resistance  
365 cassette (from pDM1079, a kind gift from Douwe Veltman) to be inserted between the two arms.

366 For *PIKfyve* gene disruption in an Ax3 background a knockout cassette was constructed in  
367 pBluescript by sequentially cloning fragment I (amplified by

368 TAGTAGGAGCTCGGATCCGGTAGATGTTTAGGTGGTGAAGTTTTACCAAC and  
369 TAGTAGTCTAGACGAGTGGTGGGAATTCATAAAGGTACGTTTCAT) and fragment II (amplified by  
370 TAGTAGAAGCTTCCATTCAAGATAGACCAACCAATAGTAGTCCTGC and  
371 TAGTAGGGTACCGGATCCCAGTGTGTAATGAGAATCAGAATAAACATCACC). The blasticidin resistance  
372 gene was inserted between fragment I and II as an XbaI – HindIII fragment derived from pBSR $\delta$ Bam  
373 [92]. Both constructs were linearised, electroporated into cells and colonies were screened by PCR.  
374 GFP-2xFYVE was expressed using pJSK489 [41] and GFP-PH<sub>CRAC</sub> with pDM631 [93]. VatM and VatB  
375 were cloned previously [94] but subcloned into the GFP-fusion expression vectors pDM352 and 353  
376 [95] to give plasmids pMJC25 and pMJC31 respectively.

### 377 Microscopy and image analysis

378 Fluorescence microscopy was performed on a Perkin-Elmer Ultraview VoX spinning disk confocal  
379 microscope running on an Olympus 1x81 body with an UplanSApo 60x oil immersion objective (NA  
380 1.4). Images were captured on a Hamamatsu C9100-50 EM-CCD camera using Volocity software by  
381 illuminating cells with 488 nm and 594 nm laser lines. Quantification was performed using Image J  
382 (<https://imagej.nih.gov>).

383 To image PI(3)P dynamics, cells were incubated in HL5 medium at 4 °C for 5 mins before addition of  
384 10  $\mu$ l of washed 3  $\mu$ m latex beads (Sigma) and centrifugation at 280 x g for 10 seconds in glass-  
385 bottomed dishes (Mat-Tek). Dishes were removed from ice and incubated at room temperature for  
386 5 mins before imaging. Images were taken every 30 s across 3 fields of view for up to 30 mins.

387 V-ATPase recruitment and acidification was performed using *Saccharomyces cerevisiae* labelled with  
388 pHrodo red (Life Technologies) as per the manufacturers instructions. *Dictyostelium* cells in HL5  
389 medium were incubated with  $1 \times 10^7$  yeast per 3 cm dish, and allowed to settle for 10 mins before the  
390 medium was removed and cells were gently compressed under a 1% agarose/HL5 disk. Images were  
391 taken every 10 s across 3 fields of view for up to 20 mins. Yeast particles were identified using the  
392 “analyse particles” plugin and mean fluorescence measured over time. V-ATPase recruitment was  
393 measured as the mean fluorescence within a 0.5  $\mu$ m wide ring selection around the yeast. The signal  
394 was then normalised to the initial fluorescence after yeast internalisation for each cell.

### 395 Endocytosis and exocytosis

396 To measure endocytosis, *Dictyostelium* at  $5 \times 10^6$  cells/ml were shaken at 180 rpm for 15 mins in HL5  
397 before addition of 100 mg/ml FITC dextran (molecular mass, 70 kDa; Sigma). At each time point 500  
398  $\mu$ l of cell suspension were added to 1 ml ice-cold KK2 on ice. Cells were pelleted at 800 x g for 2 mins  
399 and washed once in KK2. The pellet was lysed in 50 mM Na<sub>2</sub>HPO<sub>4</sub> pH 9.3 0.2% Triton X-100 and

400 measured in a fluorimeter. To measure exocytosis, cells were prepared as above and incubated in 2  
401 mg/ml FITC-dextran overnight. Cells were pelleted, washed twice in HL5 and resuspended in HL5 at  $5$   
402  $\times 10^6$  cells/ml. 500  $\mu$ l of cell suspension were taken for each time point and treated as described  
403 above.

#### 404 Phagocytosis and phagosomal activity assays

405 Phagocytosis of *E. coli* was monitored by the decrease in turbidity of the bacterial suspension over  
406 time as described [96]. An equal volume of  $2 \times 10^7$  *Dictyostelium* cells was added to a bacterial  
407 suspension with an  $OD_{600\text{ nm}}$  of 0.8, shaking at 180 rpm, and the decrease in  $OD_{600\text{ nm}}$  was recorded  
408 over time. Phagocytosis of GFP-expressing *M. smegmatis* and 1  $\mu$ m YG-carboxylated polystyrene  
409 beads (Polysciences Inc.) was previously described [53, 97].  $2 \times 10^6$  *Dictyostelium*/ml were shaken for  
410 2 hours at 150 rpm. Either 1  $\mu$ m beads (at a ratio of 200:1) or *M. smegmatis* (multiplicity of infection  
411 (MOI) 100) were added, 500  $\mu$ l aliquots of cells were taken at each time point and fluorescence was  
412 measured by flow cytometry [53].

413 Phagosomal pH and proteolytic activity were measured by feeding cells either FITC/TRITC or  
414 DQgreen- BSA/Alexa 594-labelled 3  $\mu$ m silica beads (Kisker Biotech) [53]. Briefly, cells were seeded in  
415 a 96 well plate before addition of beads and fluorescence measured on a plate reader over time. pH  
416 values were determined by the ratio of FITC to TRITC fluorescence using a calibration curve and  
417 relative proteolysis was normalised to Alexa594 fluorescence. To measure proteolytic activity in cell  
418 lysates  $4 \times 10^7$  cells/ml were resuspended in 150 mM potassium acetate pH 4.0 and lysed by 3 cycles  
419 of freeze/thaw in liquid nitrogen. After pelleting cell debris at 15000 rpm for 5 minutes at 4°C, 100  $\mu$ l  
420 of lysate was added per well. Proteolytic activity was measured on a plate reader in triplicate, as  
421 described above, using  $1 \times 10^8$  DQ-BSA/Alexa594 beads per cell. A 5 x final concentration of HALT  
422 protease inhibitor cocktail (Life Technologies) was added to samples as a negative control.

#### 423 Phagosome isolation and blotting

424 *Dictyostelium* phagosomes were purified at different stages in maturation after engulfment of latex  
425 beads as previously described [98]. Briefly  $10^9$  cells per timepoint were incubated with a 200-fold  
426 excess of 0.8  $\mu$ m diameter beads (Sigma) first in 5 ml ice-cold Soerensen buffer containing 120 mM  
427 sorbitol (SSB) pH 8 for 5 minutes, then added to 100 ml room-temperature HL5 medium in shaking  
428 culture (120 rpm) for 5 (first time point) or 15 minutes to allow phagocytosis (pulse). Engulfment  
429 was stopped by adding cells to 300ml ice-cold SSB and centrifugation. After washing away non-  
430 engulfed beads, cells were again shaken in room-temperature HL5 for the times indicated (chase) to  
431 allow maturation. At each time point, maturation was stopped using ice-cold SSB as above, and cells  
432 pelleted. Phagosomes were purified as in [56], after homogenization using 10-passages through a

433 ball homogeniser (void clearance 10  $\mu$ m). The homogenate was incubated with 10 mM Mg-ATP  
434 (Sigma) for 15 minutes before loading onto a discontinuous sucrose gradient. Phagosomes were  
435 collected from the 10-25% interface, normalised by light scattering at 600 nm and analysed by  
436 Western blot. Antibodies used were anti-VatA mAb 221-35-2 (gift from G. Gerisch), anti-vatM mAb  
437 N2 [99]; rabbit anti-cathepsin D [100] and anti-Abp1 [101]. All blots were processed in parallel from  
438 the same lysates with identical exposure and processing between cell lines.

#### 439 Bacteria killing assay

440 Killing of GFP-expressing *K. pneumoniae* was measured as previously described [60]. Briefly, 10  $\mu$ l of  
441 an overnight culture of bacteria in 280  $\mu$ l HL5 was placed in a glass-bottomed dish and allowed to  
442 settle before careful addition of 1.5 ml of a *Dictyostelium* cell suspension at  $1 \times 10^6$  cells/ml. Images  
443 were taken every 20 s for 40 min at 20x magnification. Survival time was determined by how long  
444 the GFP-fluorescence persisted after phagocytosis.

#### 445 Western blotting

446 Ax2 or *PIKfyve*<sup>-</sup> cells expressing GFP-VatM or VatB-GFP were analysed by SDS-PAGE and Western blot  
447 using a rabbit anti-GFP primary antibody (gift from A. Peden) and a fluorescently conjugated anti-  
448 rabbit 800 secondary antibody, using standard techniques. The endogenous biotinylated  
449 mitochondrial protein Methylcrotonoyl-CoA Carboxylase 1 (MCCC1) was used as a loading control  
450 using Alexa680-conjugated Streptavidin (Life Technologies) [102].

#### 451 *Legionella* infection assays

452 The following *L. pneumophila* Philadelphia-1 strains were used: virulent JR32 [103], the isogenic  
453 *ΔicmT* deletion mutant GS3011 lacking a functional Icm/Dot type IV secretion system [73], and  
454 corresponding strains constitutively producing GFP [74]. *L. pneumophila* was grown for 3 days on  
455 charcoal yeast extract (CYE) agar plates, buffered with *N*-(2-acetamido)-2-aminoethane-sulfonic acid  
456 (ACES) [104]. For infections, liquid cultures were inoculated in AYE medium at an OD<sub>600</sub> of 0.1 and  
457 grown for 21 h at 37 °C (post-exponential growth phase). To maintain plasmids, chloramphenicol  
458 was added at 5  $\mu$ g/ml.

459 Uptake by *D. discoideum*, intracellular replication or killing of GFP-producing *L. pneumophila* was  
460 analyzed by flow cytometry as described [71]. Exponentially growing amoebae were seeded onto a  
461 24-well plate ( $1 \times 10^6$  cells/ml HL5 medium per well) and allowed to adhere for at least 1–2 h. *L.*  
462 *pneumophila* grown for 21 h in AYE medium was diluted in HL5 medium and used to infect the  
463 amoebae at an MOI of 50. The infection was synchronized by centrifugation (10 min, 500 x *g*), and  
464 infected cells were incubated at 25 °C for 30 min before extracellular bacteria were removed by



465 washing twice with SorC (2 mM Na<sub>2</sub>HPO<sub>4</sub>, 15 mM KH<sub>2</sub>PO<sub>4</sub>, 50 μM CaCl<sub>2</sub>, pH 6.0). Infected amoebae  
466 were detached by vigorously pipetting and fixed (PFA 2%, sucrose 125 mM, picric acid 15%, in PIPES  
467 buffer, pH 6.0), and 1 × 10<sup>4</sup> amoebae per sample were analyzed using a using a LSR II Fortessa  
468 analyser. The GFP fluorescence intensity falling into a *Dictyostelium* scatter gate was quantified using  
469 FlowJo software (Treestar, <http://www.treestar.com>).

470 Alternatively, intracellular replication of *L. pneumophila* in *D. discoideum* was quantified by  
471 determining colony forming units (CFU) in the supernatant as described [71, 105]. Exponentially  
472 growing amoebae were washed and resuspended in MB medium (7 g of yeast extract, 14 g of  
473 thiotone E peptone, 20 mM MES in 1 l of H<sub>2</sub>O, pH 6.9). Amoebae (1 × 10<sup>5</sup> cells per well) were seeded  
474 onto a 96-well plate, allowed to adhere for at least 2 h, and infected at an MOI of 0.1 with *L.*  
475 *pneumophila* grown in AYE medium for 21 h and diluted in MB medium. The infection was  
476 synchronized by centrifugation, and the infected amoebae were incubated at 25°C. At the time  
477 points indicated, the number of bacteria released into the supernatant was quantified by plating  
478 aliquots (10–20 μl) of appropriate dilutions on CYE plates. Intracellular bacteria were also quantified  
479 by counting CFU after lysis of the infected amoebae with saponin. At the time points indicated host  
480 cells were detached by vigorous pipetting and lysed by incubation with saponin (final concentration  
481 – 0.8%) for 10 min. The number of bacteria released into the supernatant was quantified by plating  
482 20 μl aliquots of appropriate dilutions on CYE plates.

### 483 Acknowledgments

484 The authors would like to Phill Hawkins for his endeavours to separate *Dictyostelium* PIP<sub>2</sub>s

485 References

- 486 1. Flannagan RS, Cosio G, Grinstein S. Antimicrobial mechanisms of phagocytes and bacterial  
487 evasion strategies. *Nat Rev Microbiol.* 2009;7(5):355-66. Epub 2009/04/17. doi:  
488 10.1038/nrmicro2128. PubMed PMID: 19369951.
- 489 2. Di Paolo G, De Camilli P. Phosphoinositides in cell regulation and membrane dynamics.  
490 *Nature.* 2006;443(7112):651-7. doi: 10.1038/nature05185. PubMed PMID: 17035995.
- 491 3. Levin R, Grinstein S, Schlam D. Phosphoinositides in phagocytosis and macropinocytosis.  
492 *Biochim Biophys Acta.* 2015;1851(6):805-23. doi: 10.1016/j.bbali.2014.09.005. PubMed PMID:  
493 25238964.
- 494 4. Gaullier JM, Simonsen A, D'Arrigo A, Bremnes B, Stenmark H, Aasland R. FYVE fingers bind  
495 PtdIns(3)P. *Nature.* 1998;394(6692):432-3. doi: 10.1038/28767. PubMed PMID: 9697764.
- 496 5. Raiborg C, Bremnes B, Mehlum A, Gillooly DJ, D'Arrigo A, Stang E, et al. FYVE and coiled-coil  
497 domains determine the specific localisation of Hrs to early endosomes. *J Cell Sci.* 2001;114(Pt  
498 12):2255-63. PubMed PMID: 11493665.
- 499 6. Cabezas A, Pattni K, Stenmark H. Cloning and subcellular localization of a human  
500 phosphatidylinositol 3-phosphate 5-kinase, PIKfyve/Fab1. *Gene.* 2006;371(1):34-41. doi:  
501 10.1016/j.gene.2005.11.009. PubMed PMID: 16448788.
- 502 7. Michell RH, Heath VL, Lemmon MA, Dove SK. Phosphatidylinositol 3,5-bisphosphate:  
503 metabolism and cellular functions. *Trends Biochem Sci.* 2006;31(1):52-63. doi:  
504 10.1016/j.tibs.2005.11.013. PubMed PMID: 16364647.
- 505 8. Sbrissa D, Ikononov OC, Shisheva A. PIKfyve, a mammalian ortholog of yeast Fab1p lipid  
506 kinase, synthesizes 5-phosphoinositides. Effect of insulin. *J Biol Chem.* 1999;274(31):21589-97.  
507 PubMed PMID: 10419465.
- 508 9. Zolov SN, Bridges D, Zhang Y, Lee WW, Riehle E, Verma R, et al. In vivo, Pikfyve generates  
509 PI(3,5)P<sub>2</sub>, which serves as both a signaling lipid and the major precursor for PI5P. *Proc Natl Acad Sci*  
510 *U S A.* 2012;109(43):17472-7. doi: 10.1073/pnas.1203106109. PubMed PMID: 23047693; PubMed  
511 Central PMCID: PMC3491506.
- 512 10. Yamamoto A, DeWald DB, Boronenkov IV, Anderson RA, Emr SD, Koshland D. Novel PI(4)P 5-  
513 kinase homologue, Fab1p, essential for normal vacuole function and morphology in yeast. *Mol Biol*  
514 *Cell.* 1995;6(5):525-39. PubMed PMID: 7663021; PubMed Central PMCID: PMC301213.
- 515 11. Takasuga S, Sasaki T. Phosphatidylinositol-3,5-bisphosphate: metabolism and physiological  
516 functions. *J Biochem.* 2013;154(3):211-8. doi: 10.1093/jb/mvt064. PubMed PMID: 23857703.
- 517 12. McCartney AJ, Zhang Y, Weisman LS. Phosphatidylinositol 3,5-bisphosphate: low abundance,  
518 high significance. *BioEssays : news and reviews in molecular, cellular and developmental biology.*  
519 2014;36(1):52-64. doi: 10.1002/bies.201300012. PubMed PMID: 24323921; PubMed Central PMCID:  
520 PMC3906640.
- 521 13. Ho CY, Alghamdi TA, Botelho RJ. Phosphatidylinositol-3,5-bisphosphate: no longer the poor  
522 PIP<sub>2</sub>. *Traffic.* 2012;13(1):1-8. doi: 10.1111/j.1600-0854.2011.01246.x. PubMed PMID: 21736686.
- 523 14. Michell RH. Inositol lipids: from an archaeal origin to phosphatidylinositol 3,5-bisphosphate  
524 faults in human disease. *FEBS J.* 2013;280(24):6281-94. doi: 10.1111/febs.12452. PubMed PMID:  
525 23902363.
- 526 15. Ikononov O, Sbrissa D, Shisheva A. Mammalian cell morphology and endocytic membrane  
527 homeostasis require enzymatically active phosphoinositide 5-kinase PIKfyve. *J Biol Chem.*  
528 2001;276(28):26141-7. doi: 10.1074/jbc.M101722200. PubMed PMID: 11285266.
- 529 16. Ikononov OC, Sbrissa D, Mlak K, Deeb R, Fligger J, Soans A, et al. Active PIKfyve associates  
530 with and promotes the membrane attachment of the late endosome-to-trans-Golgi network  
531 transport factor Rab9 effector p40. *J Biol Chem.* 2003;278(51):50863-71. doi:  
532 10.1074/jbc.M307260200. PubMed PMID: 14530284.
- 533 17. Rutherford AC, Traer C, Wassmer T, Pattni K, Bujny MV, Carlton JG, et al. The mammalian  
534 phosphatidylinositol 3-phosphate 5-kinase (PIKfyve) regulates endosome-to-TGN retrograde

- 535 transport. *J Cell Sci.* 2006;119(Pt 19):3944-57. doi: 10.1242/jcs.03153. PubMed PMID: 16954148;  
536 PubMed Central PMCID: PMC1904490.
- 537 18. de Lartigue J, Polson H, Feldman M, Shokat K, Tooze SA, Urbán S, et al. PIKfyve Regulation  
538 of Endosome-Linked Pathways. *Traffic.* 2009;10(7):883-93. doi: 10.1111/j.1600-0854.2009.00915.x.
- 539 19. Martin S, Harper CB, May LM, Coulson EJ, Meunier FA, Osborne SL. Inhibition of PIKfyve by  
540 YM-201636 dysregulates autophagy and leads to apoptosis-independent neuronal cell death. *PLoS*  
541 *One.* 2013;8(3):e60152. doi: 10.1371/journal.pone.0060152. PubMed PMID: 23544129; PubMed  
542 Central PMCID: PMC3609765.
- 543 20. Rusten T, Vaccari T, Lindmo K, Rodahl L, Nezis I, Sem-Jacobsen C, et al. ESCRTs and Fab1  
544 regulate distinct steps of autophagy. *Curr Biol.* 2007;17(20):1817-25. doi:  
545 10.1016/j.cub.2007.09.032. PubMed PMID: 17935992.
- 546 21. Tsuruta F, Green EM, Rousset M, Dolmetsch RE. PIKfyve regulates CaV1.2 degradation and  
547 prevents excitotoxic cell death. *J Cell Biol.* 2009;187(2):279-94. doi: 10.1083/jcb.200903028.  
548 PubMed PMID: 19841139; PubMed Central PMCID: PMC2768838.
- 549 22. Min SH, Suzuki A, Stalker TJ, Zhao L, Wang Y, McKennan C, et al. Loss of PIKfyve in platelets  
550 causes a lysosomal disease leading to inflammation and thrombosis in mice. *Nat Commun.*  
551 2014;5:4691. doi: 10.1038/ncomms5691. PubMed PMID: 25178411; PubMed Central PMCID:  
552 PMCPMC4369914.
- 553 23. Zhang X, Chow CY, Sahenk Z, Shy ME, Meisler MH, Li J. Mutation of FIG4 causes a rapidly  
554 progressive, asymmetric neuronal degeneration. *Brain : a journal of neurology.* 2008;131(Pt 8):1990-  
555 2001. doi: 10.1093/brain/awn114. PubMed PMID: 18556664; PubMed Central PMCID: PMC2724900.
- 556 24. Zhang Y, McCartney AJ, Zolov SN, Ferguson CJ, Meisler MH, Sutton MA, et al. Modulation of  
557 synaptic function by VAC14, a protein that regulates the phosphoinositides PI(3,5)P(2) and PI(5)P.  
558 *EMBO J.* 2012;31(16):3442-56. doi: 10.1038/emboj.2012.200. PubMed PMID: 22842785; PubMed  
559 Central PMCID: PMC3419932.
- 560 25. Zhang Y, Zolov SN, Chow CY, Slutsky SG, Richardson SC, Piper RC, et al. Loss of Vac14, a  
561 regulator of the signaling lipid phosphatidylinositol 3,5-bisphosphate, results in neurodegeneration  
562 in mice. *Proc Natl Acad Sci U S A.* 2007;104(44):17518-23. doi: 10.1073/pnas.0702275104. PubMed  
563 PMID: 17956977; PubMed Central PMCID: PMC2077288.
- 564 26. Bohdanowicz M, Grinstein S. Role of phospholipids in endocytosis, phagocytosis, and  
565 macropinocytosis. *Physiological reviews.* 2013;93(1):69-106. doi: 10.1152/physrev.00002.2012.  
566 PubMed PMID: 23303906.
- 567 27. Ellson CD, Anderson KE, Morgan G, Chilvers ER, Lipp P, Stephens LR, et al.  
568 Phosphatidylinositol 3-phosphate is generated in phagosomal membranes. *Curr Biol.*  
569 2001;11(20):1631-5. PubMed PMID: 11676926.
- 570 28. Vieira OV, Botelho RJ, Rameh L, Brachmann SM, Matsuo T, Davidson HW, et al. Distinct roles  
571 of class I and class III phosphatidylinositol 3-kinases in phagosome formation and maturation. *J Cell*  
572 *Biol.* 2001;155(1):19-25. doi: 10.1083/jcb.200107069. PubMed PMID: 11581283; PubMed Central  
573 PMCID: PMCPMC2150784.
- 574 29. Fratti RA, Backer JM, Gruenberg J, Corvera S, Deretic V. Role of phosphatidylinositol 3-kinase  
575 and Rab5 effectors in phagosomal biogenesis and mycobacterial phagosome maturation arrest. *J Cell*  
576 *Biol.* 2001;154(3):631-44. doi: 10.1083/jcb.200106049. PubMed PMID: 11489920; PubMed Central  
577 PMCID: PMCPMC2196432.
- 578 30. Cai X, Xu Y, Cheung AK, Tomlinson RC, Alcazar-Roman A, Murphy L, et al. PIKfyve, a class III PI  
579 kinase, is the target of the small molecular IL-12/IL-23 inhibitor apilimod and a player in Toll-like  
580 receptor signaling. *Chem Biol.* 2013;20(7):912-21. doi: 10.1016/j.chembiol.2013.05.010. PubMed  
581 PMID: 23890009.
- 582 31. Ikonomov OC, Sbrissa D, Shisheva A. YM201636, an inhibitor of retroviral budding and  
583 PIKfyve-catalyzed PtdIns(3,5)P2 synthesis, halts glucose entry by insulin in adipocytes. *Biochem*  
584 *Biophys Res Commun.* 2009;382(3):566-70. doi: 10.1016/j.bbrc.2009.03.063. PubMed PMID:  
585 19289105; PubMed Central PMCID: PMC3910513.

- 586 32. Hazeki K, Nigorikawa K, Takaba Y, Segawa T, Nukuda A, Masuda A, et al. Essential roles of  
587 PIKfyve and PTEN on phagosomal phosphatidylinositol 3-phosphate dynamics. *FEBS Lett.*  
588 2012;586(22):4010-5. doi: 10.1016/j.febslet.2012.09.043. PubMed PMID: 23068606.
- 589 33. Kim GH, Dayam RM, Prashar A, Terebiznik M, Botelho RJ. PIKfyve Inhibition Interferes with  
590 Phagosome and Endosome Maturation in Macrophages. *Traffic.* 2014;15(10):1143-63. doi:  
591 10.1111/tra.12199. PubMed PMID: 25041080.
- 592 34. Choy CH, Saffi G, Gray MA, Wallace C, Dayam RM, Ou ZA, et al. Lysosome enlargement  
593 during inhibition of the lipid kinase PIKfyve proceeds through lysosome coalescence. *J Cell Sci.*  
594 2018;131(10). Epub 2018/04/18. doi: 10.1242/jcs.213587. PubMed PMID: 29661845.
- 595 35. Dayam RM, Sun CX, Choy CH, Mancuso G, Glogauer M, Botelho RJ. The Lipid Kinase PIKfyve  
596 Coordinates the Neutrophil Immune Response through the Activation of the Rac GTPase. *Journal of*  
597 *immunology.* 2017;199(6):2096-105. Epub 2017/08/06. doi: 10.4049/jimmunol.1601466. PubMed  
598 PMID: 28779020.
- 599 36. Nicot AS, Fares H, Payrastre B, Chisholm AD, Labouesse M, Laporte J. The phosphoinositide  
600 kinase PIKfyve/Fab1p regulates terminal lysosome maturation in *Caenorhabditis elegans*. *Mol Biol*  
601 *Cell.* 2006;17(7):3062-74. doi: 10.1091/mbc.E06-12-1120. PubMed PMID: 16801682; PubMed  
602 Central PMCID: PMCPMC1483040.
- 603 37. Jefferies HB, Cooke FT, Jat P, Boucheron C, Koizumi T, Hayakawa M, et al. A selective PIKfyve  
604 inhibitor blocks PtdIns(3,5)P(2) production and disrupts endomembrane transport and retroviral  
605 budding. *EMBO reports.* 2008;9(2):164-70. doi: 10.1038/sj.embor.7401155. PubMed PMID:  
606 18188180; PubMed Central PMCID: PMCPMC2246419.
- 607 38. Krishna S, Palm W, Lee Y, Yang W, Bandyopadhyay U, Xu H, et al. PIKfyve Regulates Vacuole  
608 Maturation and Nutrient Recovery following Engulfment. *Dev Cell.* 2016;38(5):536-47. doi:  
609 10.1016/j.devcel.2016.08.001. PubMed PMID: 27623384; PubMed Central PMCID:  
610 PMCPMC5046836.
- 611 39. Ho CY, Choy CH, Wattson CA, Johnson DE, Botelho RJ. The Fab1/PIKfyve Phosphoinositide  
612 Phosphate Kinase Is Not Necessary to Maintain the pH of Lysosomes and of the Yeast Vacuole. *J Biol*  
613 *Chem.* 2015;290(15):9919-28. doi: 10.1074/jbc.M114.613984. PubMed PMID: 25713145.
- 614 40. Clark J, Kay RR, Kielkowska A, Niewczas I, Fets L, Oxley D, et al. Dictyostelium uses ether-  
615 linked inositol phospholipids for intracellular signalling. *EMBO J.* 2014;33(19):2188-200. doi:  
616 10.15252/embj.201488677. PubMed PMID: 25180230; PubMed Central PMCID: PMCPMC4282506.
- 617 41. Calvo-Garrido J, King JS, Munoz-Braceras S, Escalante R. Vmp1 regulates PtdIns3P signaling  
618 during autophagosome formation in *Dictyostelium discoideum*. *Traffic.* 2014;15(11):1235-46. doi:  
619 10.1111/tra.12210. PubMed PMID: 25131297.
- 620 42. King JS, Teo R, Ryves J, Reddy JV, Peters O, Orabi B, et al. The mood stabiliser lithium  
621 suppresses PIP3 signalling in *Dictyostelium* and human cells. *Dis Model Mech.* 2009;2(5-6):306-12.  
622 doi: 10.1242/dmm.001271. PubMed PMID: 19383941; PubMed Central PMCID: PMC2675811.
- 623 43. Kortholt A, King JS, Keizer-Gunnink I, Harwood AJ, Van Haastert PJ. Phospholipase C  
624 regulation of phosphatidylinositol 3,4,5-trisphosphate-mediated chemotaxis. *Mol Biol Cell.*  
625 2007;18(12):4772-9. doi: 10.1091/mbc.E07-05-0407. PubMed PMID: 17898079; PubMed Central  
626 PMCID: PMC2096598.
- 627 44. Dormann D, Weijer G, Dowler S, Weijer CJ. In vivo analysis of 3-phosphoinositide dynamics  
628 during *Dictyostelium* phagocytosis and chemotaxis. *J Cell Sci.* 2004;117(Pt 26):6497-509. doi:  
629 10.1242/jcs.01579. PubMed PMID: 15572406.
- 630 45. Nicot AS, Fares H, Payrastre B, Chisholm AD, Labouesse M, Laporte J. The phosphoinositide  
631 kinase PIKfyve/Fab1p regulates terminal lysosome maturation in *Caenorhabditis elegans*. *Molecular*  
632 *biology of the cell.* 2006;17(7):3062-74. PubMed PMID: WOS:000238721000018.
- 633 46. Smith EW, Lima WC, Charette SJ, Cosson P. Effect of starvation on the endocytic pathway in  
634 *Dictyostelium* cells. *Eukaryot Cell.* 2010;9(3):387-92. doi: 10.1128/EC.00285-09. PubMed PMID:  
635 20097741; PubMed Central PMCID: PMCPMC2837978.

- 636 47. Veltman DM, Williams TD, Bloomfield G, Chen BC, Betzig E, Insall RH, et al. A plasma  
637 membrane template for macropinosyncytic cups. *eLife*. 2016;5. doi: 10.7554/eLife.20085. PubMed  
638 PMID: 27960076; PubMed Central PMCID: PMC5154761.
- 639 48. Clarke M, Kohler J, Arana Q, Liu T, Heuser J, Gerisch G. Dynamics of the vacuolar H(+)-ATPase  
640 in the contractile vacuole complex and the endosomal pathway of *Dictyostelium* cells. *J Cell Sci*.  
641 2002;115(Pt 14):2893-905. PubMed PMID: 12082150.
- 642 49. Buckley CM, Gopaldass N, Bosmani C, Johnston SA, Soldati T, Insall RH, et al. WASH drives  
643 early recycling from macropinosomes and phagosomes to maintain surface phagocytic receptors.  
644 *Proc Natl Acad Sci U S A*. 2016;113(40):E5906-E15. doi: 10.1073/pnas.1524532113. PubMed PMID:  
645 27647881.
- 646 50. Gary JD, Wurmser AE, Bonangelino CJ, Weisman LS, Emr SD. Fab1p is essential for PtdIns(3)P  
647 5-kinase activity and the maintenance of vacuolar size and membrane homeostasis. *J Cell Biol*.  
648 1998;143(1):65-79. PubMed PMID: 9763421; PubMed Central PMCID: PMC2132800.
- 649 51. Kerr MC, Wang JT, Castro NA, Hamilton NA, Town L, Brown DL, et al. Inhibition of the PtdIns  
650 (5) kinase PIKfyve disrupts intracellular replication of *Salmonella*. *The EMBO journal*.  
651 2010;29(8):1331-47.
- 652 52. Bak G, Lee EJ, Lee Y, Kato M, Segami S, Sze H, et al. Rapid structural changes and acidification  
653 of guard cell vacuoles during stomatal closure require phosphatidylinositol 3,5-bisphosphate. *Plant*  
654 *Cell*. 2013;25(6):2202-16. doi: 10.1105/tpc.113.110411. PubMed PMID: 23757398; PubMed Central  
655 PMCID: PMC3723621.
- 656 53. Sattler N, Monroy R, Soldati T. Quantitative analysis of phagocytosis and phagosome  
657 maturation. *Methods in molecular biology*. 2013;983:383-402. doi: 10.1007/978-1-62703-302-2\_21.  
658 PubMed PMID: 23494319.
- 659 54. Li SC, Diakov TT, Xu T, Tarsio M, Zhu W, Couoh-Cardel S, et al. The signaling lipid PI(3,5)P(2)  
660 stabilizes V(1)-V(o) sector interactions and activates the V-ATPase. *Mol Biol Cell*. 2014;25(8):1251-62.  
661 doi: 10.1091/mbc.E13-10-0563. PubMed PMID: 24523285; PubMed Central PMCID:  
662 PMC3982991.
- 663 55. Park L, Thomason PA, Zech T, King JS, Veltman DM, Carnell M, et al. Cyclical action of the  
664 WASH complex: FAM21 and capping protein drive WASH recycling, not initial recruitment. *Dev Cell*.  
665 2013;24(2):169-81. doi: 10.1016/j.devcel.2012.12.014. PubMed PMID: 23369714.
- 666 56. Gopaldass N, Patel D, Kratzke R, Dieckmann R, Hausherr S, Hagedorn M, et al. Dynamin A,  
667 Myosin IB and Abp1 couple phagosome maturation to F-actin binding. *Traffic*. 2012;13(1):120-30.  
668 doi: 10.1111/j.1600-0854.2011.01296.x. PubMed PMID: 22008230.
- 669 57. Clarke M, Maddera L, Engel U, Gerisch G. Retrieval of the vacuolar H-ATPase from  
670 phagosomes revealed by live cell imaging. *PLoS One*. 2010;5(1):e8585. doi:  
671 10.1371/journal.pone.0008585. PubMed PMID: 20052281; PubMed Central PMCID:  
672 PMC32796722.
- 673 58. Simonsen A, Lippe R, Christoforidis S, Gaullier JM, Brech A, Callaghan J, et al. EEA1 links  
674 PI(3)K function to Rab5 regulation of endosome fusion. *Nature*. 1998;394(6692):494-8. doi:  
675 10.1038/28879. PubMed PMID: 9697774.
- 676 59. Gillooly DJ, Morrow IC, Lindsay M, Gould R, Bryant NJ, Gaullier JM, et al. Localization of  
677 phosphatidylinositol 3-phosphate in yeast and mammalian cells. *Embo Journal*. 2000;19(17):4577-  
678 88. doi: 10.1093/emboj/19.17.4577. PubMed PMID: WOS:000089275600016.
- 679 60. Leiba J, Sabra A, Bodinier R, Marchetti A, Lima WC, Melotti A, et al. Vps13F links bacterial  
680 recognition and intracellular killing in *Dictyostelium*. *Cell Microbiol*. 2017. doi: 10.1111/cmi.12722.  
681 PubMed PMID: 28076662.
- 682 61. Froquet R, Lelong E, Marchetti A, Cosson P. *Dictyostelium discoideum*: a model host to  
683 measure bacterial virulence. *Nat Protoc*. 2009;4(1):25-30. doi: 10.1038/nprot.2008.212. PubMed  
684 PMID: 19131953.

- 685 62. Hilbi H, Hoffmann C, Harrison CF. Legionella spp. outdoors: colonization, communication and  
686 persistence. *Environ Microbiol Rep.* 2011;3(3):286-96. doi: 10.1111/j.1758-2229.2011.00247.x.  
687 PubMed PMID: 23761274.
- 688 63. Finsel I, Hilbi H. Formation of a pathogen vacuole according to Legionella pneumophila: how  
689 to kill one bird with many stones. *Cell Microbiol.* 2015;17(7):935-50. doi: 10.1111/cmi.12450.  
690 PubMed PMID: 25903720.
- 691 64. Ge J, Shao F. Manipulation of host vesicular trafficking and innate immune defence by  
692 Legionella Dot/Icm effectors. *Cell Microbiol.* 2011;13(12):1870-80. doi: 10.1111/j.1462-  
693 5822.2011.01710.x. PubMed PMID: 21981078.
- 694 65. Weber S, Wagner M, Hilbi H. Live-cell imaging of phosphoinositide dynamics and membrane  
695 architecture during Legionella infection. *MBio.* 2014;5(1):e00839-13. doi: 10.1128/mBio.00839-13.  
696 PubMed PMID: 24473127; PubMed Central PMCID: PMC3903275.
- 697 66. Brombacher E, Urwyler S, Ragaz C, Weber SS, Kami K, Overduin M, et al. Rab1 guanine  
698 nucleotide exchange factor SidM is a major phosphatidylinositol 4-phosphate-binding effector  
699 protein of Legionella pneumophila. *J Biol Chem.* 2009;284(8):4846-56. doi:  
700 10.1074/jbc.M807505200. PubMed PMID: 19095644; PubMed Central PMCID: PMC2643517.
- 701 67. Hilbi H, Weber S, Finsel I. Anchors for effectors: subversion of phosphoinositide lipids by  
702 legionella. *Front Microbiol.* 2011;2:91. doi: 10.3389/fmicb.2011.00091. PubMed PMID: 21833330;  
703 PubMed Central PMCID: PMC3153050.
- 704 68. Jank T, Bohmer KE, Tzivelekis T, Schwan C, Belyi Y, Aktories K. Domain organization of  
705 Legionella effector SetA. *Cell Microbiol.* 2012;14(6):852-68. doi: 10.1111/j.1462-5822.2012.01761.x.  
706 PubMed PMID: 22288428.
- 707 69. Finsel I, Ragaz C, Hoffmann C, Harrison CF, Weber S, van Rahden VA, et al. The Legionella  
708 effector RidL inhibits retrograde trafficking to promote intracellular replication. *Cell Host Microbe.*  
709 2013;14(1):38-50. doi: 10.1016/j.chom.2013.06.001. PubMed PMID: 23870312.
- 710 70. Harding CR, Mattheis C, Mousnier A, Oates CV, Hartland EL, Frankel G, et al. LtpD Is a Novel  
711 Legionella pneumophila Effector That Binds Phosphatidylinositol 3-Phosphate and Inositol  
712 Monophosphatase IMPA1. *Infection and Immunity.* 2013;81(11):4261-70. doi: 10.1128/iai.01054-13.  
713 PubMed PMID: WOS:000325719900031.
- 714 71. Weber SS, Ragaz C, Reus K, Nyfeler Y, Hilbi H. Legionella pneumophila exploits PI(4)P to  
715 anchor secreted effector proteins to the replicative vacuole. *Plos Pathogens.* 2006;2(5):418-30. doi:  
716 ARTN e46  
10.1371/journal.ppat.0020046. PubMed PMID: WOS:000202894500009.
- 717 72. Dolinsky S, Haneburger I, Cichy A, Hannemann M, Itzen A, Hilbi H. The Legionella  
718 longbeachae Icm/Dot substrate SidC selectively binds phosphatidylinositol 4-phosphate with  
719 nanomolar affinity and promotes pathogen vacuole-endoplasmic reticulum interactions. *Infect*  
720 *Immun.* 2014;82(10):4021-33. doi: 10.1128/IAI.01685-14. PubMed PMID: 25024371; PubMed  
721 Central PMCID: PMC3903275.
- 722 73. Segal G, Shuman HA. Intracellular multiplication and human macrophage killing by Legionella  
723 pneumophila are inhibited by conjugal components of IncQ plasmid RSF1010. *Molecular*  
724 *Microbiology.* 1998;30(1):197-208. doi: 10.1046/j.1365-2958.1998.01054.x. PubMed PMID:  
725 WOS:000076538500017.
- 726 74. Hilbi H, Segal G, Shuman HA. Icm/dot-dependent upregulation of phagocytosis by Legionella  
727 pneumophila. *Mol Microbiol.* 2001;42(3):603-17. PubMed PMID: 11722729.
- 728 75. Rizopoulos Z, Balistreri G, Kilcher S, Martin CK, Syedbasha M, Helenius A, et al. Vaccinia Virus  
729 Infection Requires Maturation of Macropinosomes. *Traffic.* 2015;16(8):814-31. doi:  
730 10.1111/tra.12290. PubMed PMID: 25869659; PubMed Central PMCID: PMC3903275.
- 731 76. Sbrissa D, Ikononov OC, Shisheva A. PIKfyve lipid kinase is a protein kinase: downregulation  
732 of 5'-phosphoinositide product formation by autophosphorylation. *Biochemistry.*  
733 2000;39(51):15980-9. Epub 2000/12/22. PubMed PMID: 11123925.

- 735 77. Dong XP, Shen D, Wang X, Dawson T, Li X, Zhang Q, et al. PI(3,5)P(2) controls membrane  
736 trafficking by direct activation of mucolipin Ca(2+) release channels in the endolysosome. *Nat*  
737 *Commun.* 2010;1:38. doi: 10.1038/ncomms1037. PubMed PMID: 20802798; PubMed Central PMCID:  
738 PMCPMC2928581.
- 739 78. Dayam RM, Saric A, Shilliday RE, Botelho RJ. The Phosphoinositide-Gated Lysosomal Ca(2+)  
740 Channel, TRPML1, Is Required for Phagosome Maturation. *Traffic.* 2015;16(9):1010-26. doi:  
741 10.1111/tra.12303. PubMed PMID: 26010303.
- 742 79. Li X, Rydzewski N, Hider A, Zhang X, Yang J, Wang W, et al. A molecular mechanism to  
743 regulate lysosome motility for lysosome positioning and tubulation. *Nat Cell Biol.* 2016;18(4):404-17.  
744 doi: 10.1038/ncb3324. PubMed PMID: 26950892.
- 745 80. Lima WC, Leuba F, Soldati T, Cosson P. Mucolipin controls lysosome exocytosis in  
746 *Dictyostelium*. *J Cell Sci.* 2012;125(Pt 9):2315-22. doi: 10.1242/jcs.100362. PubMed PMID: 22357942.
- 747 81. Horwitz MA. THE LEGIONNAIRES-DISEASE BACTERIUM (*LEGIONELLA-PNEUMOPHILA*)  
748 INHIBITS PHAGOSOME-LYSOSOME FUSION IN HUMAN-MONOCYTES. *Journal of Experimental*  
749 *Medicine.* 1983;158(6):2108-26. doi: 10.1084/jem.158.6.2108. PubMed PMID:  
750 WOS:A1983RV00200023.
- 751 82. Lamothe J, Huynh KK, Grinstein S, Valvano MA. Intracellular survival of *Burkholderia*  
752 *cenocepacia* in macrophages is associated with a delay in the maturation of bacteria-containing  
753 vacuoles. *Cell Microbiol.* 2007;9(1):40-53. doi: 10.1111/j.1462-5822.2006.00766.x. PubMed PMID:  
754 16869828.
- 755 83. Smith LM, Dixon EF, May RC. The fungal pathogen *Cryptococcus neoformans* manipulates  
756 macrophage phagosome maturation. *Cell Microbiol.* 2015;17(5):702-13. doi: 10.1111/cmi.12394.  
757 PubMed PMID: 25394938.
- 758 84. Segal G, Shuman HA. *Legionella pneumophila* utilizes the same genes to multiply within  
759 *Acanthamoeba castellanii* and human macrophages. *Infection and Immunity.* 1999;67(5):2117-24.  
760 PubMed PMID: WOS:000079909300010.
- 761 85. Steenbergen JN, Shuman HA, Casadevall A. *Cryptococcus neoformans* interactions with  
762 amoebae suggest an explanation for its virulence and intracellular pathogenic strategy in  
763 macrophages. *Proc Natl Acad Sci U S A.* 2001;98(26):15245-50. doi: 10.1073/pnas.261418798.  
764 PubMed PMID: 11742090; PubMed Central PMCID: PMC65014.
- 765 86. Hasselbring BM, Patel MK, Schell MA. *Dictyostelium discoideum* as a model system for  
766 identification of *Burkholderia pseudomallei* virulence factors. *Infect Immun.* 2011;79(5):2079-88.  
767 doi: 10.1128/IAI.01233-10. PubMed PMID: 21402765; PubMed Central PMCID: PMC3088138.
- 768 87. Hubber A, Roy CR. Modulation of host cell function by *Legionella pneumophila* type IV  
769 effectors. *Annu Rev Cell Dev Biol.* 2010;26:261-83. doi: 10.1146/annurev-cellbio-100109-104034.  
770 PubMed PMID: 20929312.
- 771 88. Isberg RR, O'Connor TJ, Heidtman M. The *Legionella pneumophila* replication vacuole:  
772 making a cosy niche inside host cells. *Nature Reviews Microbiology.* 2009;7(1):12-24. doi:  
773 10.1038/nrmicro1967. PubMed PMID: WOS:000262110300009.
- 774 89. Lima WC, Pillonel T, Bertelli C, Ifrid E, Greub G, Cosson P. Genome sequencing and functional  
775 characterization of the non-pathogenic *Klebsiella pneumoniae* KpGe bacteria. *Microbes and*  
776 *infection / Institut Pasteur.* 2018;20(5):293-301. Epub 2018/05/14. doi:  
777 10.1016/j.micinf.2018.04.001. PubMed PMID: 29753816.
- 778 90. Froquet R, Lelong E, Marchetti A, Cosson P. *Dictyostelium discoideum*: a model host to  
779 measure bacterial virulence. *Nature Protocols.* 2009;4(1):25-30. doi: 10.1038/nprot.2008.212.  
780 PubMed PMID: WOS:000265781800003.
- 781 91. Wilkins A, Khosla M, Fraser DJ, Spiegelman GB, Fisher PR, Weeks G, et al. *Dictyostelium* RasD  
782 is required for normal phototaxis, but not differentiation. *Genes Dev.* 2000;14(11):1407-13. PubMed  
783 PMID: 10837033; PubMed Central PMCID: PMCPMC316659.
- 784 92. Sutoh K. A transformation vector for *dictyostelium discoideum* with a new selectable marker  
785 bsr. *Plasmid.* 1993;30(2):150-4. doi: 10.1006/plas.1993.1042. PubMed PMID: 8234487.

- 786 93. Veltman DM, Lemieux MG, Knecht DA, Insall RH. PIP(3)-dependent macropinocytosis is  
787 incompatible with chemotaxis. *J Cell Biol.* 2014;204(4):497-505. doi: 10.1083/jcb.201309081.  
788 PubMed PMID: 24535823; PubMed Central PMCID: PMC3926956.
- 789 94. Carnell M, Zech T, Calaminus SD, Ura S, Hagedorn M, Johnston SA, et al. Actin polymerization  
790 driven by WASH causes V-ATPase retrieval and vesicle neutralization before exocytosis. *J Cell Biol.*  
791 2011;193(5):831-9. doi: 10.1083/jcb.201009119. PubMed PMID: 21606208; PubMed Central PMCID:  
792 PMC3105540.
- 793 95. Veltman DM, Akar G, Bosgraaf L, Van Haastert PJ. A new set of small, extrachromosomal  
794 expression vectors for *Dictyostelium discoideum*. *Plasmid.* 2009;61(2):110-8. doi:  
795 10.1016/j.plasmid.2008.11.003. PubMed PMID: 19063918.
- 796 96. King J, Insall RH. Parasexual genetics of *Dictyostelium* gene disruptions: identification of a ras  
797 pathway using diploids. *Bmc Genetics.* 2003;4. doi: 10.1186/1471-2156-4-12. PubMed PMID:  
798 WOS:000184659500001.
- 799 97. Arafah S, Kicka S, Trofimov V, Hagedorn M, Andreu N, Wiles S, et al. Setting up and  
800 monitoring an infection of *Dictyostelium discoideum* with mycobacteria. *Methods Mol Biol.*  
801 2013;983:403-17. doi: 10.1007/978-1-62703-302-2\_22. PubMed PMID: 23494320.
- 802 98. Gotthardt D, Dieckmann R, Blancheteau V, Kistler C, Reichardt F, Soldati T. Preparation of  
803 intact, highly purified phagosomes from *Dictyostelium*. *Methods Mol Biol.* 2006;346:439-48. doi:  
804 10.1385/1-59745-144-4:439. PubMed PMID: 16957306.
- 805 99. Fok AK, Clarke M, Ma L, Allen RD. Vacuolar H(+)-ATPase of *Dictyostelium discoideum*. A  
806 monoclonal antibody study. *J Cell Sci.* 1993;106 ( Pt 4):1103-13. Epub 1993/12/01. PubMed PMID:  
807 8126094.
- 808 100. Journet A, Chapel A, Jehan S, Adessi C, Freeze H, Klein G, et al. Characterization of  
809 *Dictyostelium discoideum* cathepsin D. *Journal of cell science.* 1999;112(21):3833-43.
- 810 101. Dieckmann R, von Heyden Y, Kistler C, Gopaldass N, Hausherr S, Crawley SW, et al. A myosin  
811 IK-Abp1-PakB circuit acts as a switch to regulate phagocytosis efficiency. *Mol Biol Cell.*  
812 2010;21(9):1505-18. Epub 2010/03/05. doi: 10.1091/mbc.E09-06-0485. PubMed PMID: 20200225;  
813 PubMed Central PMCID: PMC2861610.
- 814 102. Davidson AJ, King JS, Insall RH. The use of streptavidin conjugates as immunoblot loading  
815 controls and mitochondrial markers for use with *Dictyostelium discoideum*. *Biotechniques.*  
816 2013;55(1):39-41. doi: 10.2144/000114054. PubMed PMID: 23834384.
- 817 103. Sadosky AB, Wiater LA, Shuman HA. Identification of *Legionella pneumophila* genes required  
818 for growth within and killing of human macrophages. *Infect Immun.* 1993;61(12):5361-73. PubMed  
819 PMID: 8225610; PubMed Central PMCID: PMC281323.
- 820 104. Feeley JC, Gibson RJ, Gorman GW, Langford NC, Rasheed JK, Mackel DC, et al. Charcoal-yeast  
821 extract agar: primary isolation medium for *Legionella pneumophila*. *J Clin Microbiol.* 1979;10(4):437-  
822 41. PubMed PMID: 393713; PubMed Central PMCID: PMC273193.
- 823 105. Solomon JM, Rupper A, Cardelli JA, Isberg RR. Intracellular growth of *Legionella pneumophila*  
824 in *Dictyostelium discoideum*, a system for genetic analysis of host-pathogen interactions. *Infect*  
825 *Immun.* 2000;68(5):2939-47. PubMed PMID: 10768992; PubMed Central PMCID: PMC97507.

826



## 827 Figure Legends

### 828 Figure 1

829 **Knockout or inhibition of PIKfyve leads to a swollen vesicle phenotype.** (A) DIC images of Ax3, two  
830 independent *PIKfyve*<sup>-</sup> clones and a random integrant growing in HL5 medium. Arrows indicate the  
831 enlarged vesicles. (B) Changes in morphology upon incubation in low osmolarity starvation buffer  
832 (KK2) compared to full medium (HL5). Swollen vesicles in *PIKfyve*<sup>-</sup> cells became initially more  
833 apparent but were lost as cells entered differentiation. (C) Induction of swollen vesicles with 5  $\mu$ M  
834 apilimod, a PIKfyve-specific inhibitor, images taken in HL5 medium after 5 hours of treatment.

### 835 Figure 2

836 **PIKfyve-null cells have growth defects.** Measurement of (A) macropinocytosis or (B) exocytosis in  
837 Ax3 and *PIKfyve*<sup>-</sup> cells as measured by uptake or loss of FITC dextran. (C) Growth rates in axenic  
838 culture. *PIKfyve*<sup>-</sup> cells had a significantly longer generation time than Ax3 cells (Student's t-test). (D)  
839 Phagocytosis of *E. coli*, as measured by the ability of *Dictyostelium* cells to reduce the turbidity of a  
840 bacterial suspension. (E) Growth *PIKfyve* mutants on lawns of *K. pneumoniae* as indicated by the  
841 clearance of bacteria-free plaques on agar plates. All data plotted are mean +/- SD.

### 842 Figure 3

843 **Disruption of PIKfyve prevents V-ATPase delivery and phagosome acidification.** (A) Measurement  
844 of phagosomal acidification in Ax2 and *PIKfyve*<sup>-</sup> cells after engulfment of beads conjugated to pH-  
845 sensitive fluorophores. After initial acidification, *Dictyostelium* phagosomes reneutralise ~45 minutes  
846 prior to exocytosis. (B) Recruitment of the V-ATPase subunit GFP-VatM to phagocytosed pHrodo-  
847 labelled yeast visualised by confocal time-lapse imaging. (C) Quantification of GFP-VatM recruitment  
848 over time averaged across multiple phagocytic events. Images were quantified by automated  
849 selection of a 0.5  $\mu$ m-thick ring surrounding the yeast at each time point (see yellow dotted circle in  
850 (B)). N indicates the total number of cells analysed over 3 independent experiments. Quantification  
851 of the associated increase in yeast-associated pHrodo fluorescence, indicating acidification is shown  
852 in (D). Data shown are mean +/- SEM, p values calculated by Student's t-test.

### 853 Figure 4

854 **PIKfyve is required for hydrolase activity and proteolysis.** (A) Phagosomal proteolysis measured by  
855 dequenching of DQ-BSA-conjugated beads after phagocytosis. (B) Total proteolytic activity in cell  
856 lysates against DQ-BSA-beads is unchanged upon *PIKfyve* disruption, dotted lines are parallel  
857 samples in the presence of protease inhibitors. (C) Western blot of cathepsin D protein levels, three  
858 independent samples of each strain were normalised for total protein and are quantified in (D).

859 Loading control is fluorescent streptavidin which recognises the mitochondrial protein MCCC1; P-  
860 value from a one-sample T-test. (E) Analysis of phagosome maturation, by purifying phagosomes  
861 from cells after maturation for the indicated times. VatA is a subunit of the  $V_1$  subcomplex of the V-  
862 ATPase, whereas VatM is a  $V_0$  component. Blots are from the same samples and are representative  
863 of multiple independent purifications. (F) Analysis of PI(3)P dynamics in the absence of PIKfyve.  
864 PI(3)P was monitored by the recruitment of GFP-2xFYVE following phagocytosis of 3  $\mu$ m beads  
865 (asterisks) imaged by confocal time-lapse microscopy. (G) Time that GFP-2xFYVE stays associated  
866 with phagosomes following engulfment, indicating that PI(3)P removal is not PIKfyve-dependent. N  
867 indicates the total number of cells quantified across 3 independent experiments. Data shown are  
868 mean  $\pm$  SEM (A & B) or SD (G).

#### 869 **Figure 5**

870 **Bacterial survival is increased in *PIKfyve*-null cells.** (A) Stills from widefield timelapse movies of  
871 *Dictyostelium* cells eating GFP-expressing *Klebsiella pneumoniae*. The point of bacterial cell  
872 permeabilisation and death can be inferred from the quenching of GFP fluorescence after  
873 engulfment. Arrows indicate captured bacteria. This is quantified in (B) which shows a Kaplan-Meier  
874 survival graph, based on the persistence of bacteria GFP-fluorescence within the amoebae. 60  
875 bacteria were followed across three independent experiments and survived significantly longer in  
876 *PIKfyve*-null cells than Ax2 ( $p < 0.0001$ , Mantel-Cox test). (C) Loss of PIKfyve inhibits growth on diverse  
877 bacteria. Growth was assessed by plating serial dilutions of amoebae on lawns of different bacteria  
878 and dark plaques indicate amoebae growth. Data for all bacteria are summarised in (D).

#### 879 **Figure 6**

880 **PIKfyve is required to suppress *Legionella* replication.** A) Wild-type (Ax2, black lines), or *PIKfyve*-null  
881 *Dictyostelium* (red lines) were infected (MOI 50) with wild-type (JR32, solid lines) or avirulent ( $\Delta icmT$ ,  
882 dotted lines) *Legionella* expressing GFP and fixed 40 min post infection before analysis by flow  
883 cytometry. The GFP fluorescence intensity, indicating bacteria per cell was indistinguishable  
884 between the two *Dictyostelium* strains, but higher for JR32 than  $\Delta icmT$ . Uninfected cells are  
885 represented by pale black/red lines. Data are representative of three independent experiments,  
886 performed in duplicate. (B) Survival of GFP- $\Delta icmT$  *Legionella* after infecting Ax2 and *PIKfyve*-null  
887 amoebae (MOI 50). Bacterial colony forming units (CFU) were determined at each timepoint after  
888 lysis of the *Dictyostelium* amoebae. (C) Outcome of infection with either wild-type (solid lines) or  
889  $\Delta icmT$  (dashed lines) *Legionella*. *Dictyostelium* cells were infected at a MOI of 0.1, and intracellular  
890 growth measured by CFU's at each indicated time. Data shown are the means  $\pm$  SEM of 3  
891 independent experiments performed in triplicate (\*= $p < 0.05$ , \*\*= $p < 0.01$  Student's t-test vs equivalent

892 Ax2 infection). (D) Flow cytometry of intracellular bacterial burden of Ax3-derived *PIKfyve*-null cells  
893 infected with GFP-producing *Legionella* strains over time. Virulent *Legionella* replicate more  
894 efficiently in *PIKfyve*<sup>-</sup> *Dictyostelium*, as indicated by the increasing proportions of amoebae  
895 containing high levels of GFP over time. Graphs show >10,000 cells measured at each time point, and  
896 are representative of 3 independent experiments.

#### 897 [Supplementary Figure 1](#)

898 ***PIKfyve* gene disruption.** (A) Schematic representation of *Dictyostelium* *PIKfyve* indicating the site  
899 where the blasticidin resistance cassette was inserted into the gene to generate knockouts.

#### 900 [Supplementary Figure 2](#)

901 ***PIKfyve* is not required for development.** (A) Images of *Dictyostelium* fruiting bodies formed on filter  
902 discs, indicating a normal morphology and proportioning in the absence of *PIKfyve*. (B) Higher  
903 magnification differential interference contrast (DIC) images of pores collected from the fruiting  
904 bodies in (A).

#### 905 [Supplementary Figure 3](#)

906 **Conservation of *PIKfyve*-null phenotypes in Ax2-derived mutants.** Phagocytosis of (A) of 1  $\mu$ m  
907 beads or (B) GFP-expressing *Mycobacterium smegmatis* measured by flow cytometry, is normal in  
908 *PIKfyve*-null cells. (C) Growth on lawns of *K. pneumoniae* is impaired. Colony diameter over time is  
909 plotted in (D). All data are means +/- SD.

#### 910 [Supplementary Figure 4](#)

911 **VatB-GFP expression has a dominant negative effect on acidification.** (A) Western blot of cells  
912 expressing VatB-GFP or GFP-VatM, probed with an anti-GFP antibody (green). There was no  
913 difference in expression levels between Ax2 and *PIKfyve*<sup>-</sup> cells for either reporter. However, VatB-  
914 GFP was expressed at higher levels than GFP-VatM, likely because it is present in 3 copies per V-  
915 ATPase complex. Loading control is the mitochondrial protein MCCC1, recognised by Alexa680-  
916 conjugated streptavidin (red). (B) Recruitment of vatB-GFP to phagosomes containing pHrodo-  
917 labelled yeast. (C) Automated image analysis of vatB-GFP recruitment as described in Figure 3,  
918 showing reduced recruitment in *PIKfyve*-null cells. (D) Phagosome acidification, measured by the  
919 increase in pHrodo fluorescence over time. Note that expression of vatB-GFP in Ax2 cells significantly  
920 reduces phagosome acidification relative to GFP-vatM expressing cells, indicating disruption of V-  
921 ATPase activity. Values plotted are mean +/- SEM.

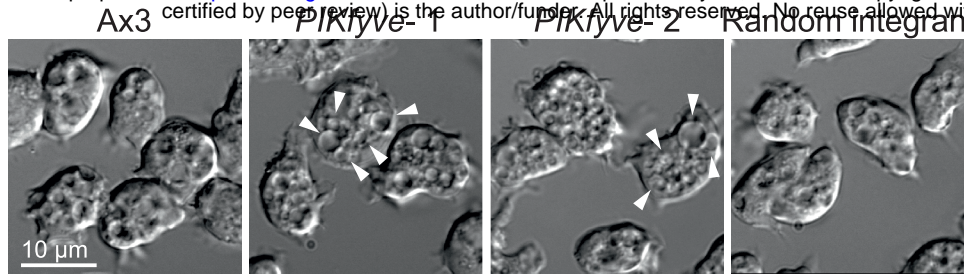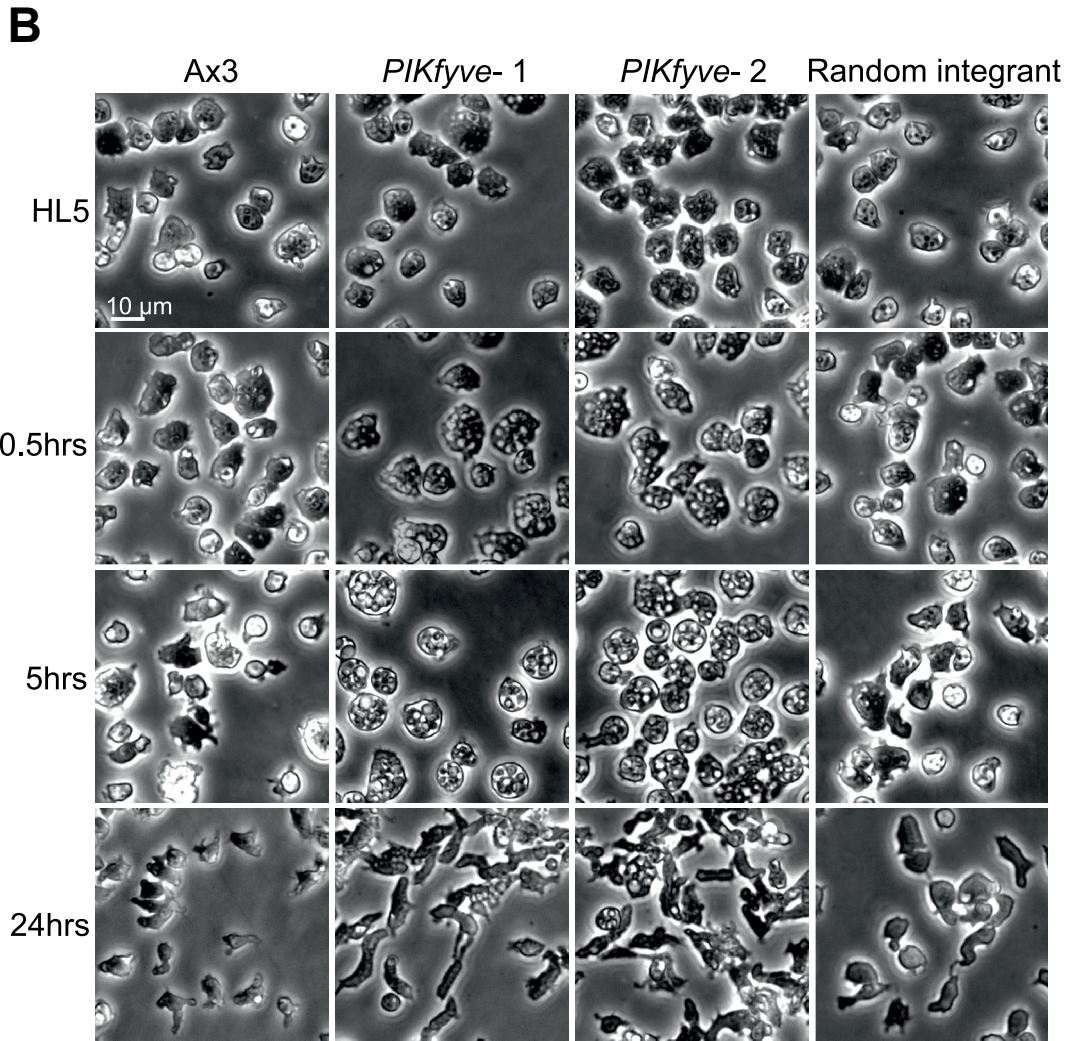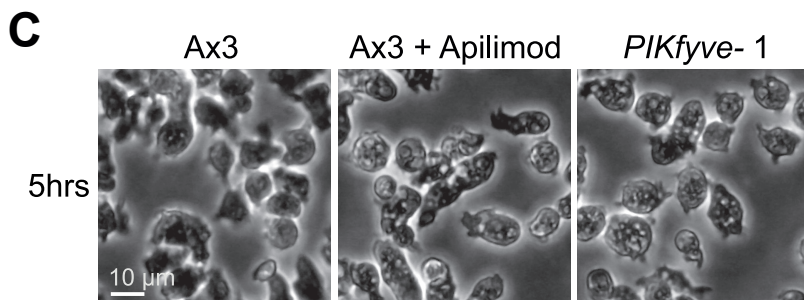

**Figure 1: KO or inhibition of PIKfyve leads to a swollen vesicle phenotype**

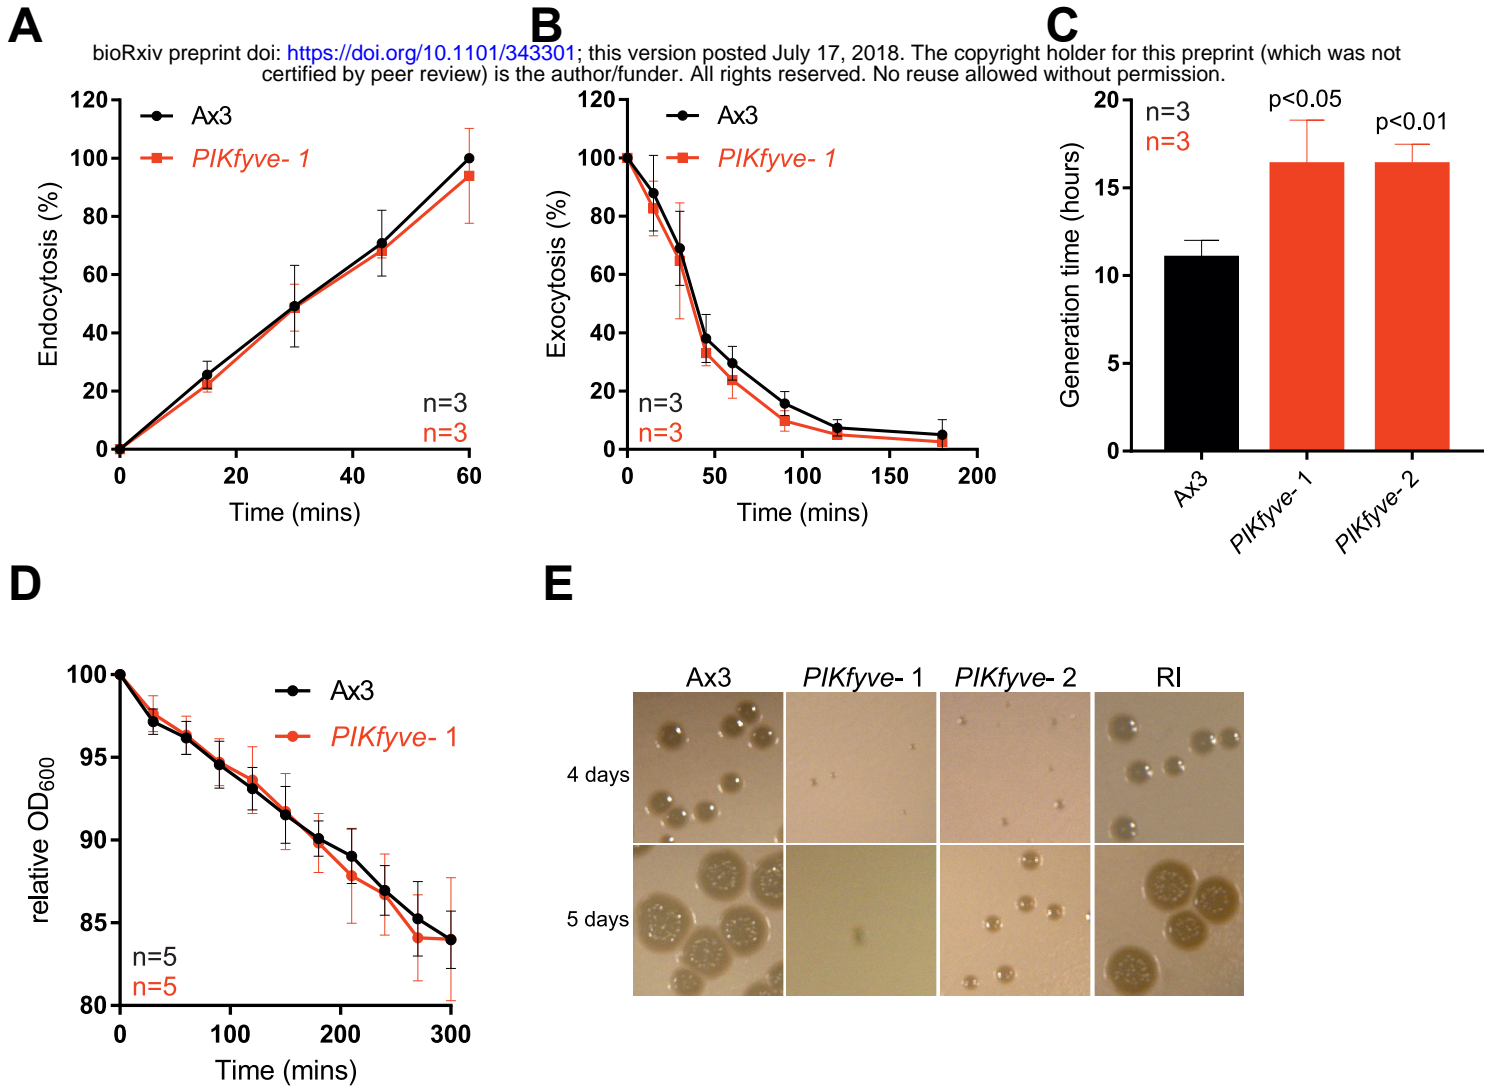

**Figure 2: *PIKfyve*- cells have growth defects**

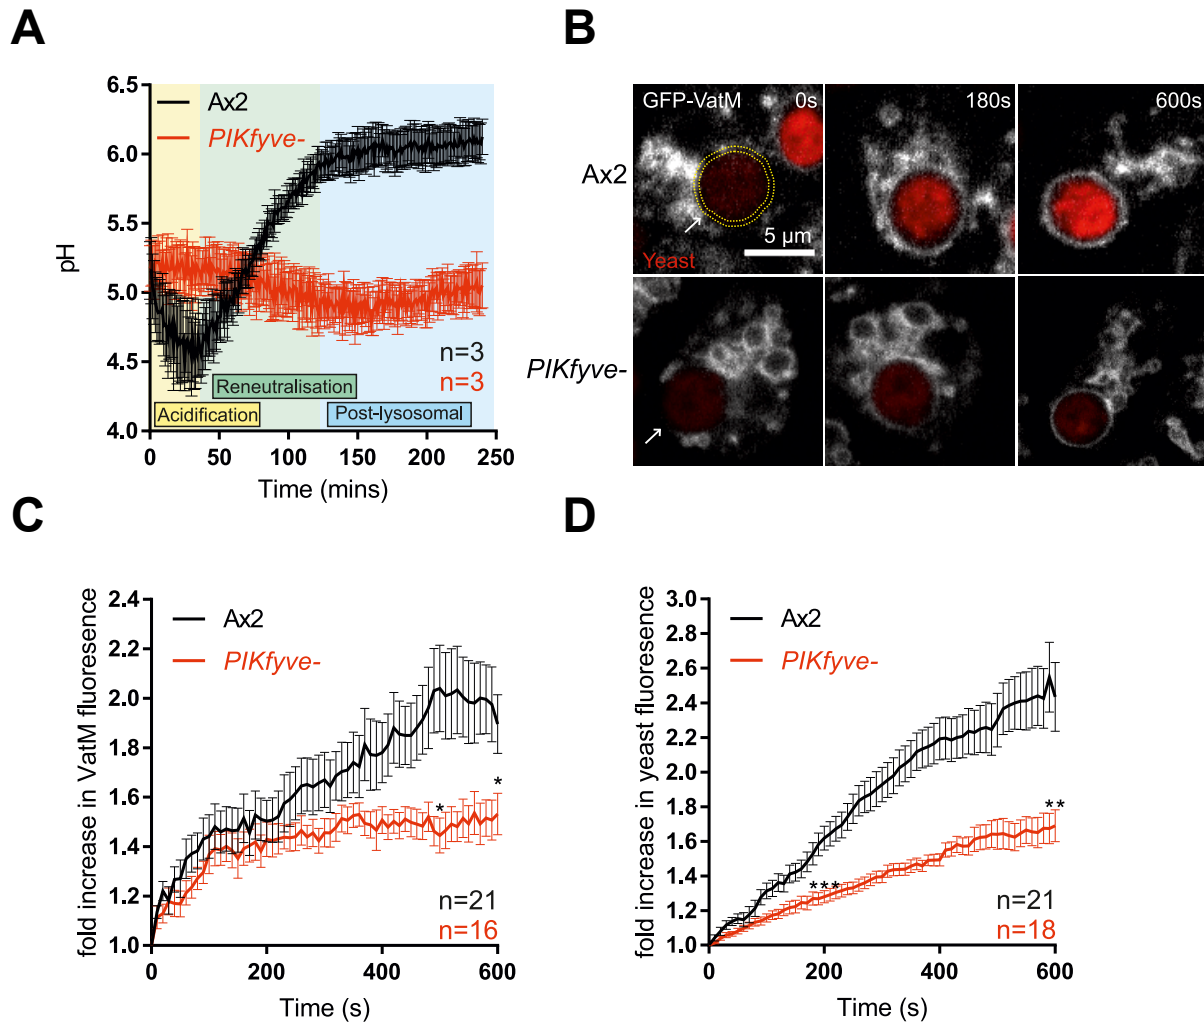

**A**

bioRxiv preprint doi: <https://doi.org/10.1101/343301>; this version posted July 17, 2018. The copyright holder for this preprint (which was not certified by peer review) is the author/funder. All rights reserved. No reuse allowed without permission.

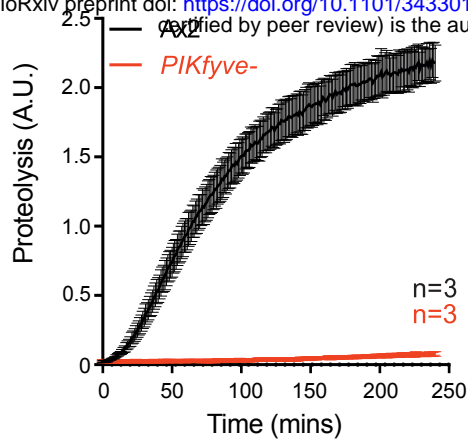**B**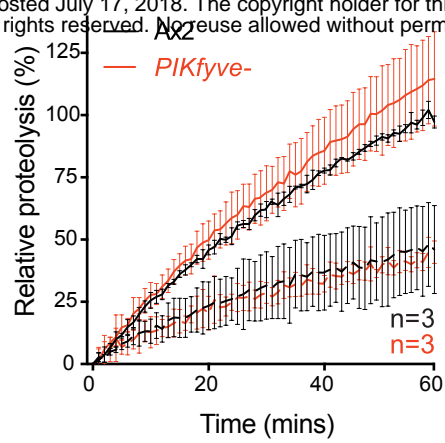**C**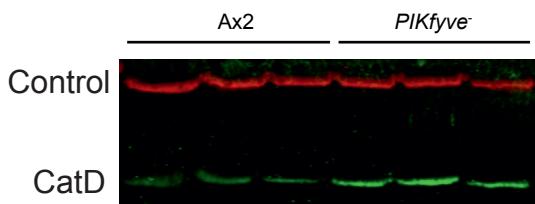**D**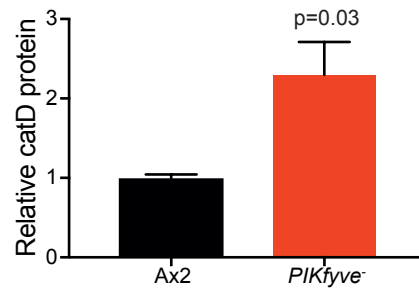**E**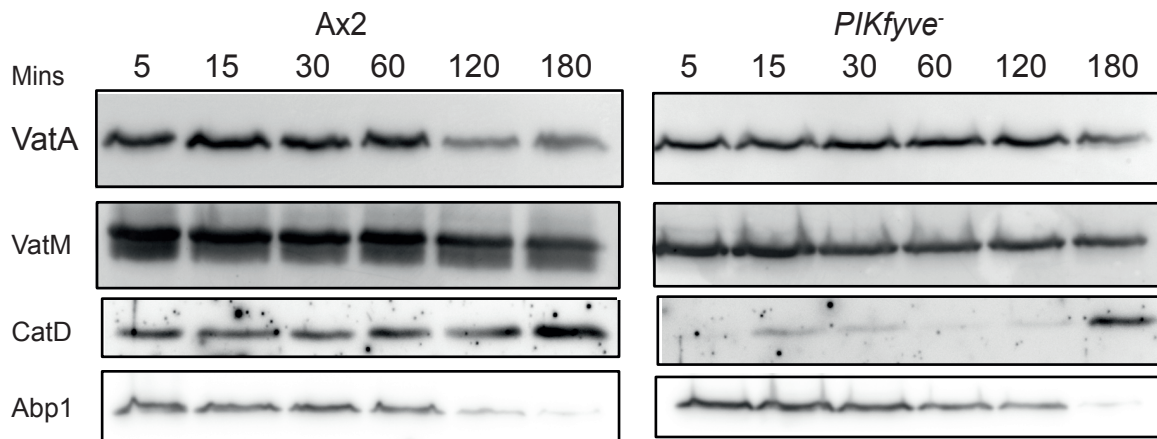**F**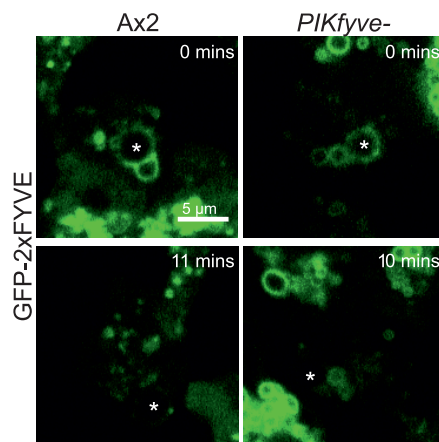**G**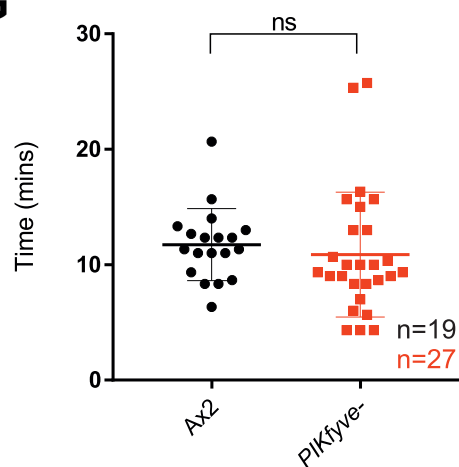

**Figure 4: PIKfyve is required for proteolysis and hydrolase delivery**

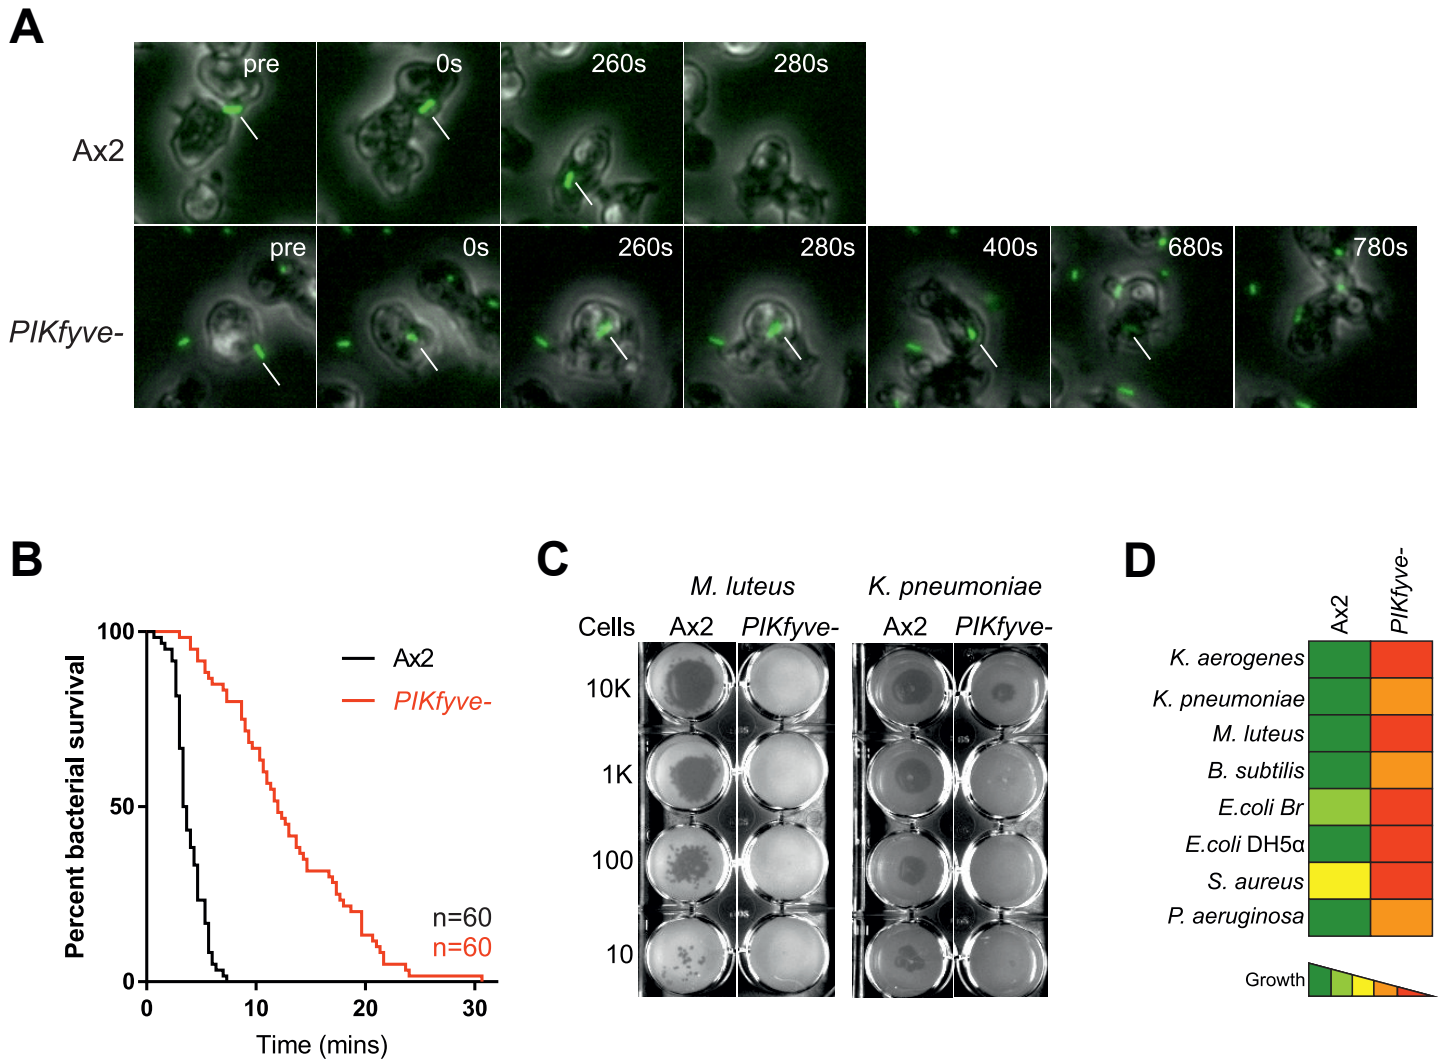

**Figure 5: Bacterial survival is increased in *PIKfyve*<sup>-</sup> cells**



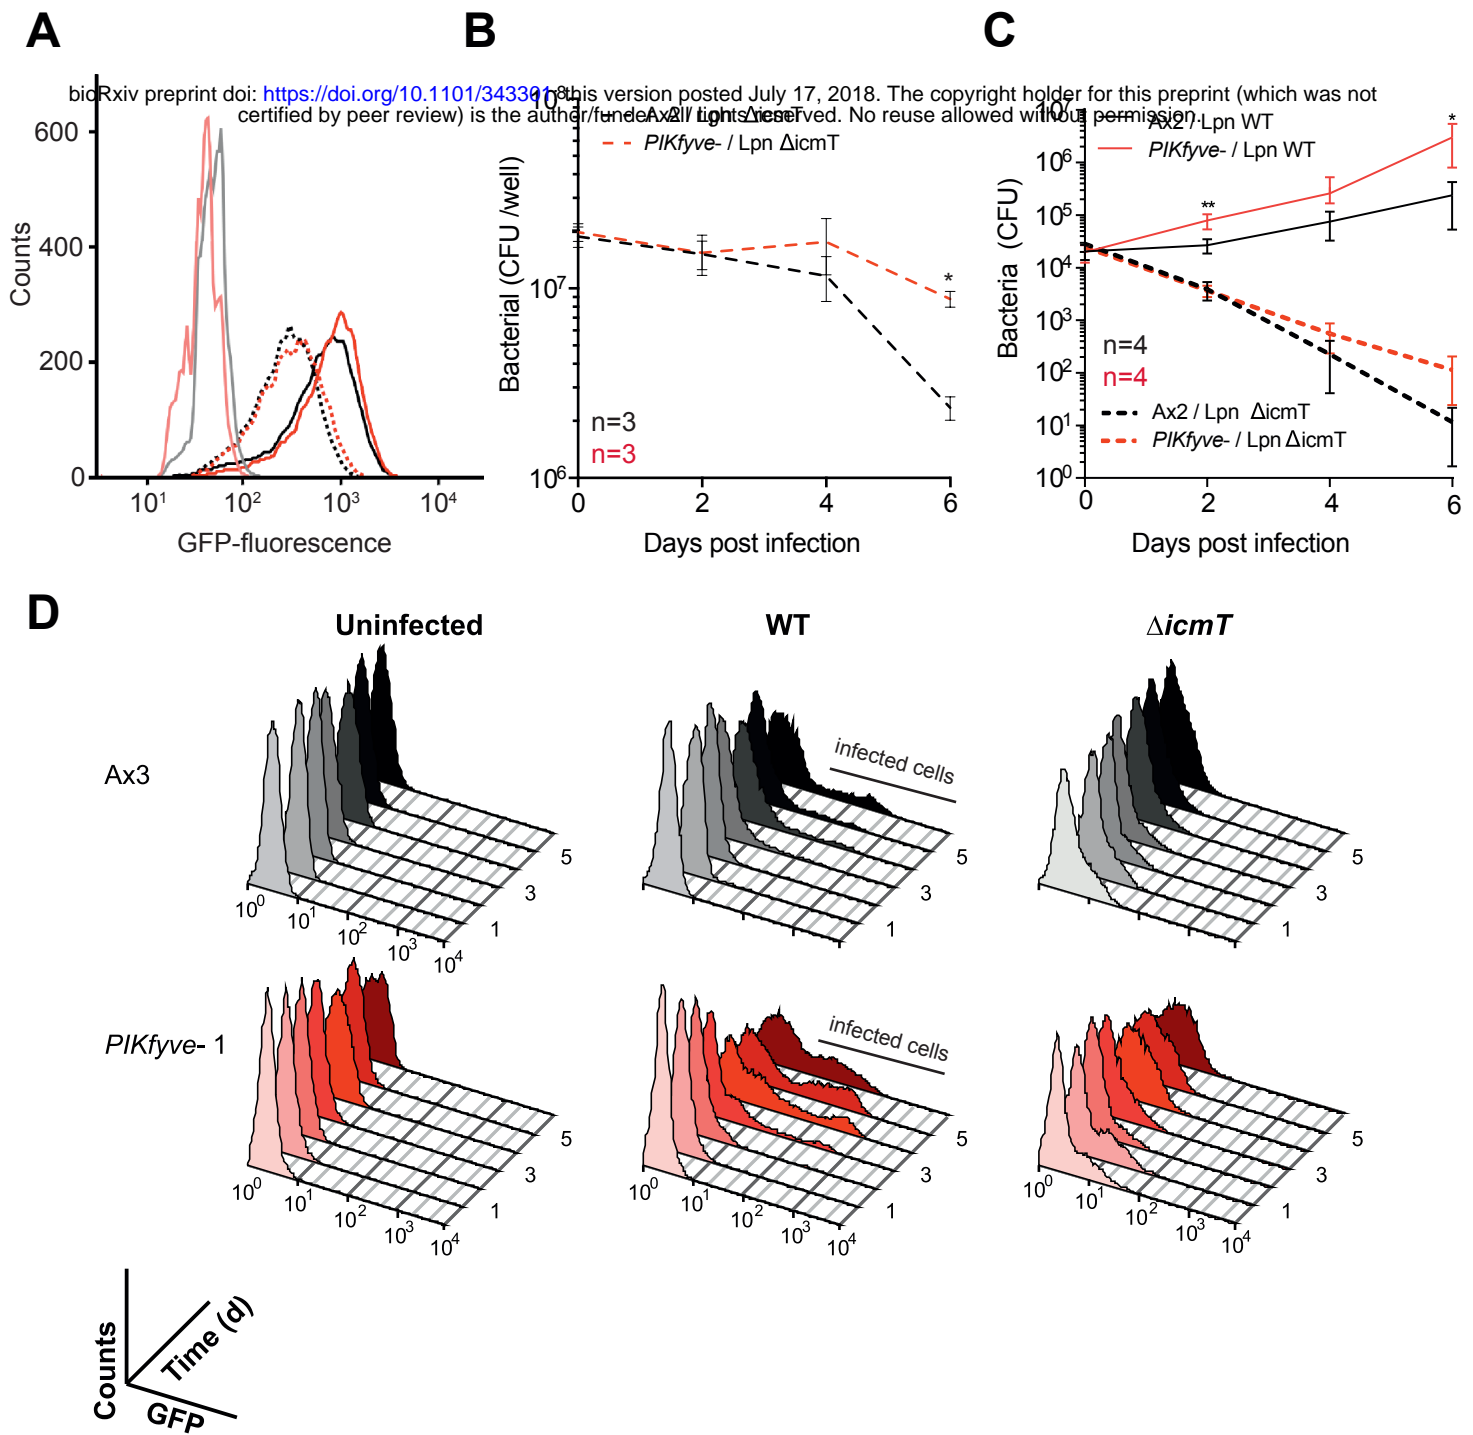

**Figure 6: *PIKfyve* is required to suppress *Legionella* infection**

**A**

bioRxiv preprint doi: <https://doi.org/10.1101/343301>; this version posted July 17, 2018. The copyright holder for this preprint (which was not certified by peer review) is the author/funder. All rights reserved. No reuse allowed without permission.

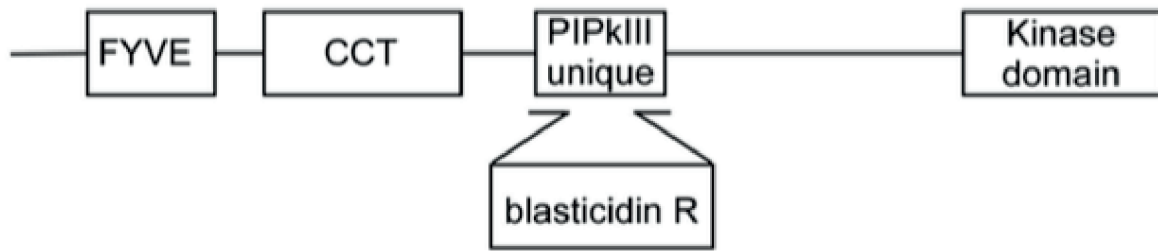

## Supplementary figure 1: PIKfyve gene disruption

**A**

bioRxiv preprint doi: <https://doi.org/10.1101/343301>; this version posted July 17, 2018. The copyright holder for this preprint (which was not certified by peer review) is the author/funder. All rights reserved. No reuse allowed without permission.

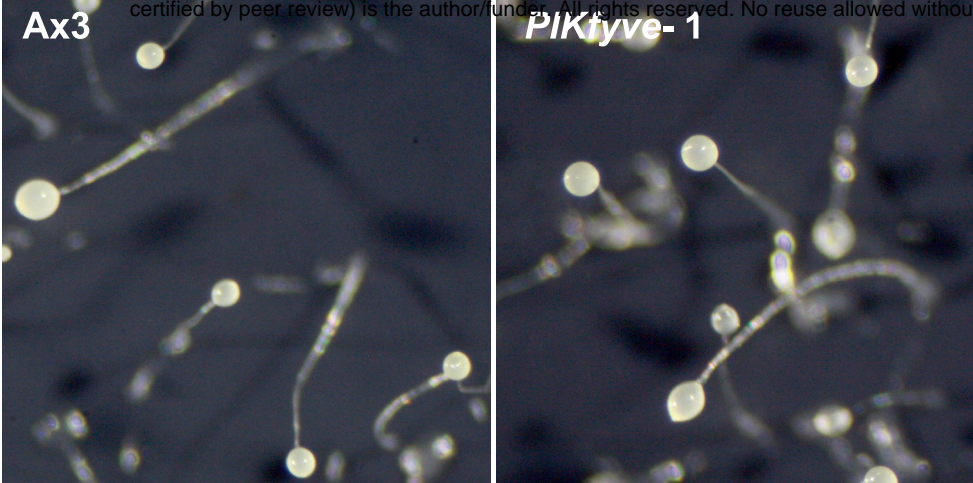**B**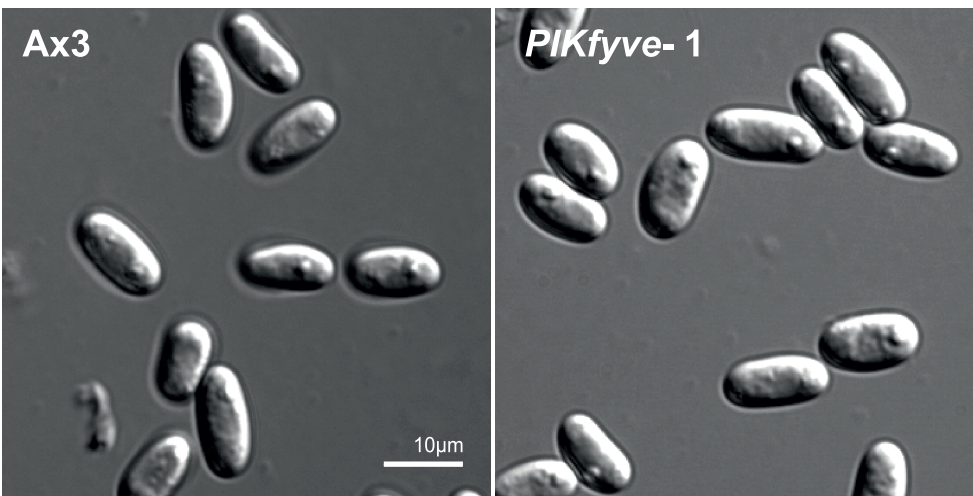

**Supplementary figure 2: PIKfyve is not required for development**

**A**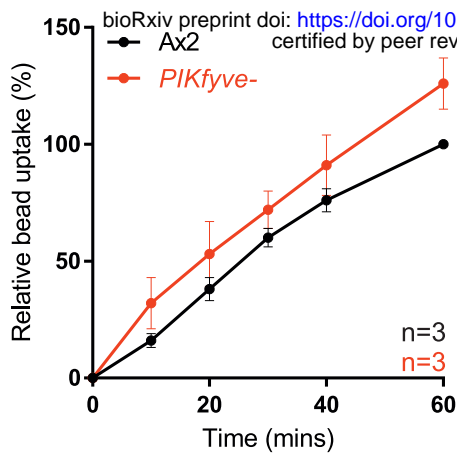**B**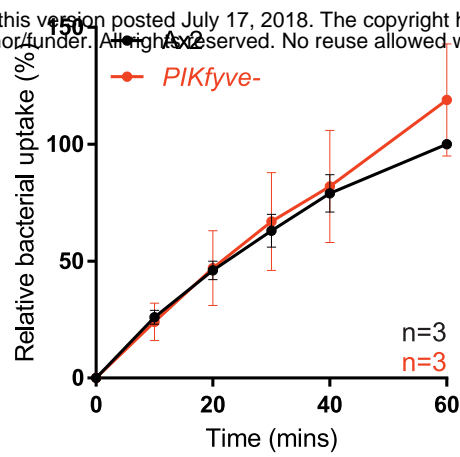**C**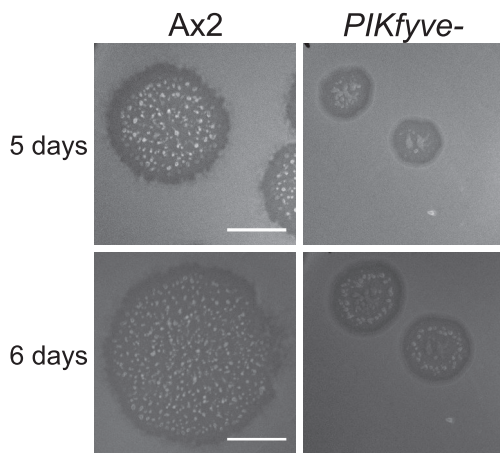**D**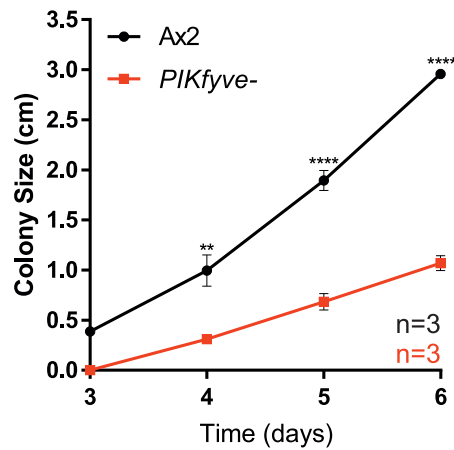

**Supplementary figure 3: *PIKfyve*<sup>-</sup> in Ax2 genetic background is comparable to knockout in Ax3**

**A**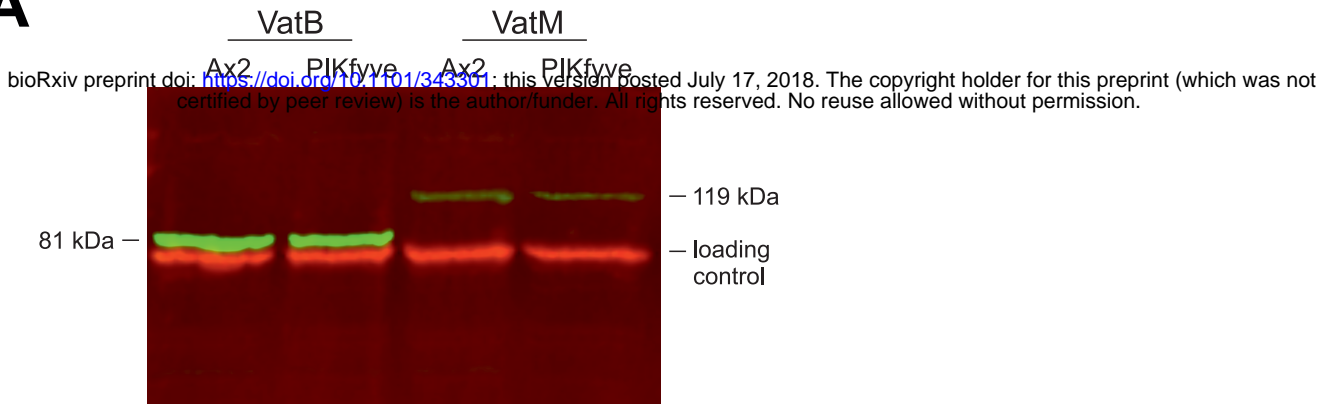**B**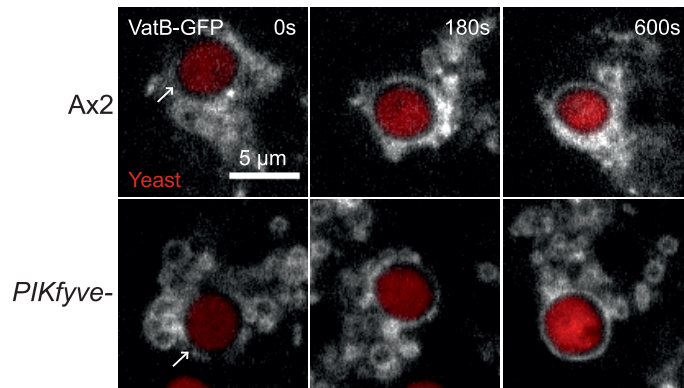**C**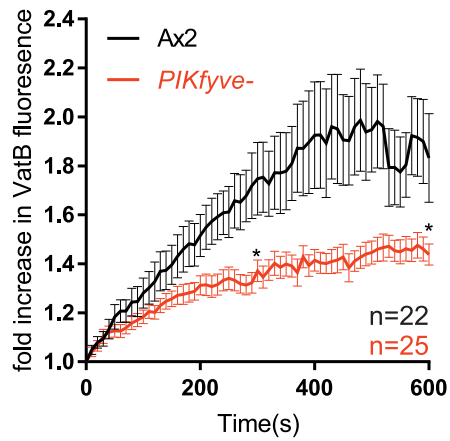**D**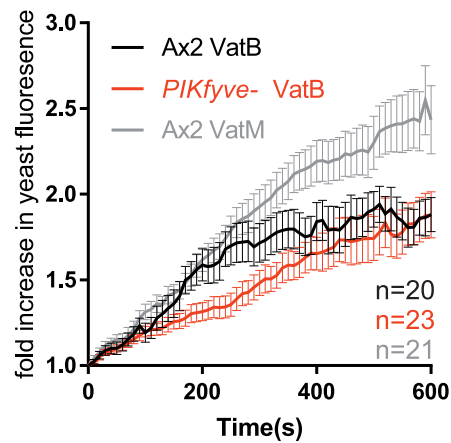

**Supplementary figure 4: VatB expression has a dominant negative effect on acidification**
